# Hacking the diversity of SARS-CoV-2 and SARS-like coronaviruses in human, bat and pangolin populations

Nicholas J. Dimonaco<sup>1\*</sup>, Mazdak Salavati<sup>2\*</sup>, Barbara Shih<sup>2\*†</sup>

**\*For correspondence:**

[nid16@aber.ac.uk](mailto:nid16@aber.ac.uk) (NJD);  
[barbara.shih@roslin.ed.ac.uk](mailto:barbara.shih@roslin.ed.ac.uk) (BBS);  
[mazdak.salavati@roslin.ed.ac.uk](mailto:mazdak.salavati@roslin.ed.ac.uk) (MS)

<sup>†</sup>These authors contributed equally to this work

<sup>1</sup>Institute of Biological, Environmental and Rural Sciences, Aberystwyth University, Wales, UK; <sup>2</sup>The Roslin Institute, Royal (Dick) School of Veterinary Studies, University of Edinburgh

**Abstract** In 2019, a novel coronavirus, SARS-CoV-2/nCoV-19, emerged in Wuhan, China, and has been responsible for the current COVID-19 pandemic. The evolutionary origins of the virus remain elusive and understanding its complex mutational signatures could guide vaccine design and development. As part of the international “CoronaHack” in April 2020 (<https://www.coronahack.co.uk/>), we employed a collection of contemporary methodologies to compare the genomic sequences of coronaviruses isolated from human (SARS-CoV-2;n=163), bat (bat-CoV;n=215) and pangolin (pangolin-CoV;n=7) available in public repositories. Following *de novo* gene annotation prediction, analysis on gene-gene similarity network, codon usage bias and variant discovery were carried out. Strong host-associated divergences were noted in ORF3a, ORF6, ORF7a, ORF8 and S, and in codon usage bias profiles. Lastly, we have characterised several high impact variants (inframe insertion/deletion or stop gain) in bat-CoV and pangolin-CoV populations, some of which are found in the same amino acid position and may be highlighting loci of potential functional relevance.

## Background

The continued and increasing occurrence of pandemics that threaten worldwide public health due to human activity is considered to be inevitable *Patz et al. (2000)*; *Madhav et al. (2017)*. The COVID-19 (2019-current) pandemic caused by the emergence in Hubei, China, of what has now been identified as Severe Acute Respiratory Syndrome Coronavirus 2/ Novel Coronavirus 2019 (SARS-CoV-2/2019-nCoV) by The Coronaviridae Study Group *of the International et al. (2020)*, has brought a number of questions regarding its transmission, containment and treatment to the urgent attention of researchers and clinicians. The urgency of such questions has spurred a number of atypical approaches and collaborations between experts of different fields and as such, this study was carried out as part of a “CoronaHack” hackathon event in April 2020 where the authors gained access to genomes and related metadata available at the time (Dec 2019 - April 2020).

Viruses of the Coronaviridae family have long been studied and while there have been great advances in our understanding, each new emergence has brought about its own questions. The sub-family Coronavirus consists of four genera, Alphacoronavirus (Alpha-CoV), Betacoronavirus (Beta-CoV), Gammacoronavirus and DeltaCoronavirus. Coronaviruses are a family of single-stranded, enveloped and extremely diverse RNA viruses which have come into contact with humans numerous

40 times over the past few decades alone *Weiss (2020)*. At around 30kb, they exhibit at least six Open  
41 Reading Frames (ORFs), ORF1a/b comprising of approximately 2/3 of the genome which encodes  
42 up to 16 non-structural replicase proteins through ribosomal frame-shifting, and four structural  
43 proteins: membrane (M), nucleocapsid (N), envelope (E) and spike (S) glycoprotein *Perlman and*  
44 *Netland (2009)*. Coronaviruses have developed a number of different strategies to infiltrate their  
45 host-cells. In human-associated CoVs, it has been shown that different parts of the human An-  
46 giotensin Converting Enzyme 2 (hACE2) can be bound to by their respective S proteins. Pathogens  
47 such as SARS-CoV-1 (Severe Acute Respiratory Syndrome Coronavirus) and MERS-CoV (Middle East  
48 Respiratory Syndrome Coronavirus) have shown Coronaviruses to be capable of presumed effi-  
49 cient adaptation to their human host and exhibit high levels of pathogenicity *Amer et al. (2018)*;  
50 *Hung (2003)*. Interestingly, SARS-CoV-1 and MERS, which along with SARS-CoV-2 are both Beta-CoVs,  
51 exhibit only 79.5% and 50% sequence similarity at the whole genome level to SARS-CoV-2, whereas  
52 SARS-CoV-2-like coronaviruses found in pangolins (pangolin-CoVs) and bat coronavirus (bat-CoV)  
53 SARSr-Ra-BatCoV-RaTG13 (RaTG13) are 91.02% and 96% respectively *Zhu et al. (2020)*. The rela-  
54 tionship of SARS-CoV-2 to other SARS-like coronaviruses, the possible role of bats and pangolins  
55 as reservoir species and the role of recombination in its emergence, are of great interest *Boni et al.*  
56 *(2020)*. Speculations around other intermediary hosts are also at play, which might have affected  
57 the ability for zoonotic transmission for SARS-CoV-2 to its human host *Zhang and Holmes (2020)*.  
58 Crucially, this evolutionary relationship between SARS-CoV-2 and its lineage may prove to be an im-  
59 portant factor in the eventual management or containment of the virus. Moreover, the mutation  
60 events along the evolutionary timeline of SARS-CoV-2 are of importance in the discovery of possible  
61 adaption signatures within the viral population. At the time of the hackathon, there were two main  
62 suspected SARS-like reservoir host species; bat and pangolin (named bat-CoV and pangolin-CoV).

63 With this in mind, our study aimed to systematically compare a broad selection of contemporary  
64 available SARS-CoV-2, bat-CoV and pangolin-CoV at genome, gene, codon usage and variant levels,  
65 without preference for strains or sub-genera. This was comprised of 46 SARS-CoV-2 genomes iso-  
66 lated early in the pandemic from Wuhan, China (Late 2019-Early 2020), 117 SARS-CoV-2 genomes  
67 isolated in Germany, representing the later stage of global transmission, 215 bat-CoV genomes of  
68 Alpha-CoVs and Beta-CoVs and 7 pangolin-CoV genomes, of which 5 were annotated as Beta-CoVs.  
69 During the hackathon, it was recognised that potential biases can arise from directly comparing  
70 SARS-CoV-2 to a wide repertoire of coronaviruses of varying stages of genome annotation. There-  
71 fore, we performed a new comparative annotation of all genomes used in this study. To further  
72 validate mutational adaptations which may have facilitated the zoonotic transmission of SARS-CoV-  
73 2, a codon usage analyse was carried out between the SARS-CoV-2 reference genes and the genes  
74 identified using the abovementioned approaches.

75 In addition, we profiled codon usage bias across our dataset, as in the process of host adap-  
76 tation, viruses can evolve to express different preferential codon usages *Jitobaom et al. (2020)*;  
77 *Kumar et al. (2018)*; *Chen et al. (2020)*

78 Through examining the inherent sequence diversity between a comprehensive collection of  
79 SARS-CoV-2, bat-CoV and pangolin-CoV, we aimed to highlight naturally occurring high impact vari-  
80 ations that can potentially introduce a moderate change in the resulting protein, such as the in-  
81 sersion, deletion of a amino acid or early termination of the sequence. Understanding the stability  
82 and variability of these positions may potentially aid future design of vaccines or treatments. For  
83 instance, an amino acid position where insertion or deletion is commonly found in a coronavirus  
84 affecting other species may indicate that its alteration does not pose a dramatic impact to the  
85 overall protein folding, or that the position is important for transmission to a new host.

86 Our work is differentiated by the way a systematic approach was used to process a non-selective  
87 group of these viral genomes from public repositories, prior to applying a wide range of contem-  
88 porary methodologies and genomic knowledge that highlight the variations that exist between  
89 different host species.

## 90 Results

### 91 Data Collection and Phylogenetic Analysis

92 We were able to collate 215 bat-CoV genomes of varying families (Alphacoronaviruses and Beta-  
93 coronaviruses) with only one exhibiting a small proportion or genomic uncertainty (presence of  
94 0.45% 'N' nucleotide). However, only 7 pangolin-CoV genomes, of which 5 were annotated as Be-  
95 tacoronaviurs, were available at the start of this study. 3 pangolin-CoV genomes also contained  
96 levels of the ambiguous 'N' nucleotide, two of them at high levels (6.88 and 8.19%). A population  
97 of post-outbreak SARS-CoV-2 genomes from Charite *Elbe et al. (2017)*, Germany, were also col-  
98 lated for further analysis. For the phylogenetic analysis, we examined the complete set of 269  
99 genomes (7 pangolin, 47 Wuhan SARS-CoV-2 isolates (including 1 Ensembl Wuhan reference) and  
100 215 bat). The phylogenetic tree produced at the whole genome level showed a clear separation be-  
101 tween SARS-CoV-2 Wuhan isolates and the bat-CoV genomes (except RaTG13)1. The 7 pangolin-CoV  
102 genomes cluster together and are closest to the SARS-CoV-2 Wuhan isolate population of genomes,  
103 discounting the RaTG13 genome which was the closest to SARS-CoV-2. The Ensembl Wuhan refer-  
104 ence genome *Yates et al. (2020)* has been placed within the other Wuhan isolates.

105 The tree produced was used as an analytical anchor for which we could use to refer to in the  
106 codon usage bias and variant analysis. High impact variants and codon usage clusters were plotted  
107 on the tree to show their distribution across the different clades along the topology of the tree.

### 108 Gene Identification

109 The complimentary approach of using PROKKA *Seemann (2014)* and BLAST *Altschul et al. (1990)*  
110 to identify the set of genes for each of the viral genomes complemented each other and enabled  
111 a comparative analysis. A breakdown of the number of genes identified for each dataset is shown  
112 in table 1 and appendix table 3 presented the number of genes annotated by PROKKA or BLAST.

| Dataset  | Min. | Median | Mean | Max. | Sample Count |
|----------|------|--------|------|------|--------------|
| Wuhan    | 7    | 11     | 11   | 13   | 46           |
| Charite  | 9    | 11     | 11   | 12   | 117          |
| Bat      | 2    | 9      | 9    | 12   | 215          |
| Pangolin | 10   | 11     | 12   | 17   | 7            |

**Table 1.** This table presents the distribution of the number of predicted genes for each dataset. Bat-CoV exhibit the widest distribution of gene count, and pangolin-CoV has the highest number of gene count, with one genome having 17 predicted genes. These outliers have low sequence or assembly quality. In the case of the pangolin-CoV genome reporting 17 genes, it has low quality ('NNNN') nucleotide regions spanning the centre of genes, which causes PROKKA to identify the two ends of one gene. The median gene count only varying in bat-CoVs, likely attributed to the large phylogenetic variation exhibited across the bat genomes.

113 BLAST was utilised in attempts to capture a number of genes with strong homology to the SARS-  
114 CoV-2 ref ( $\geq 80\%$ ) that were not identified by PROKKA. In particular, these genes were E, ORF8 and  
115 ORF10.

116 Whilst this has enabled the characterisation of E and ORF10 in many genomes, no additional  
117 ORF8 were identified through BLAST apart from 6 examples in the Charite dataset (genomes had  
118 levels of ambiguous 'N'). This could in part be due to the high threshold setting used in the BLAST  
119 search ( $>80\%$  identity). ORF8 was only identified in 3 bat-CoVs and 1 pangolin-CoV with this com-  
120 bined approach. At least 38 additional bat-CoV ORF8 and 4 additional pangolin-CoV ORF8 rep-  
121 resentatives were identified by PROKKA with less than 80% identity. Genes utilising ribosomal  
122 frameshifting such as the aforementioned ORF1ab, are inherently difficult to identify correctly with-  
123 out extensive analysis involving techniques and evidence such as RNA expression analysis. For the  
124 majority of genomes studied, PROKKA was able to identify two large ORFs spanning almost the  
125 entire length of the ORF1ab locus and detect a central coronavirus frame-shifting stimulation el-  
126 ement (named Corona\_FSE and separating the two ORFs) which is a conserved stem-loop of RNA

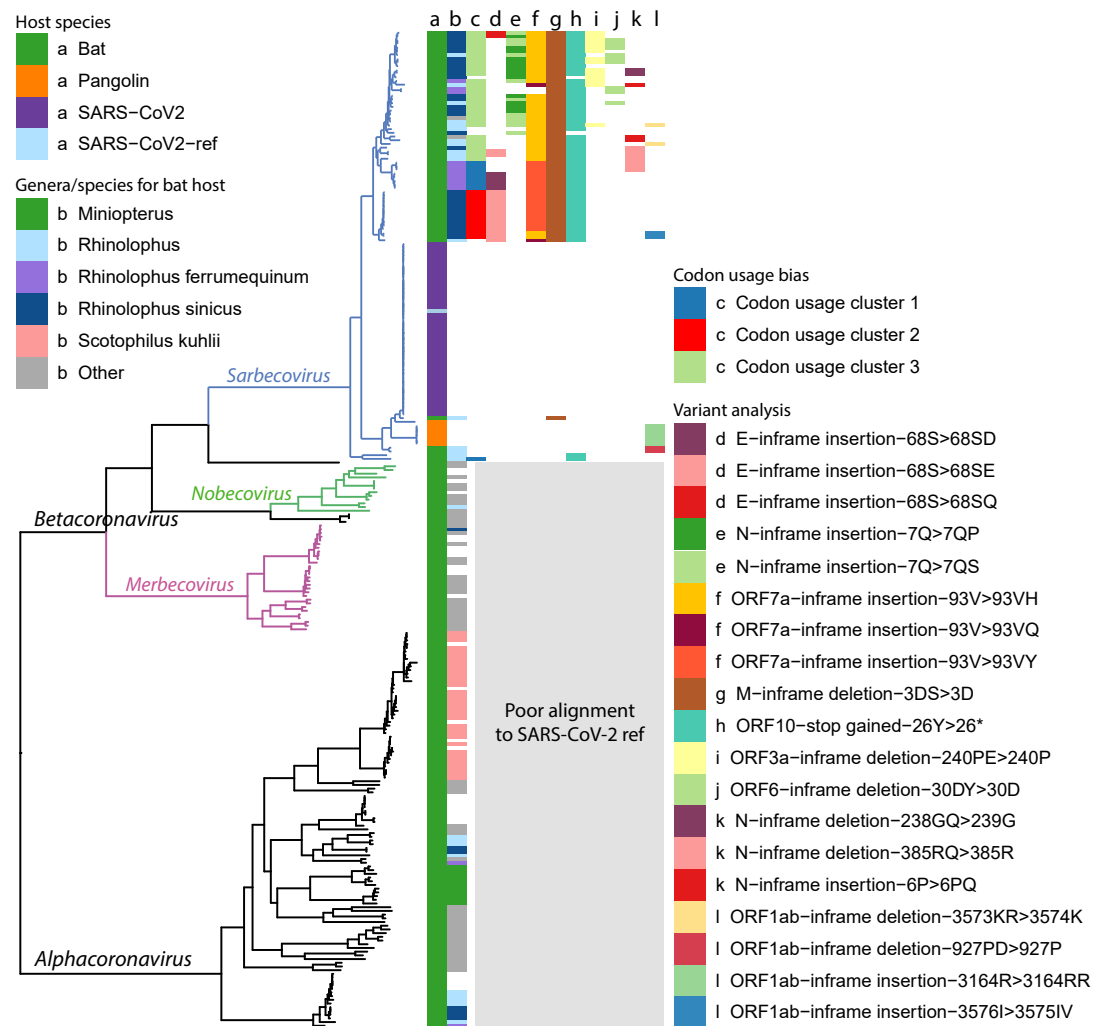

**Figure 1.** Ladderised phylogenetic tree of bat-CoV, pangolin-CoV and SARS-CoV-2 (Wuhan dataset and reference) genomes. Metadata are indicated on the top left corner, including a) dataset name and b) the bat genera and species if the genome is of bat host. Clades for Betacoronavirus subgenera, Sarbecovirus, Nobecovirus and Merbecovirus, are indicated on the graph, showing that our codon usage bias and variant analysis results are restricted to the Sarbecovirus due to poor alignment between SARS-CoV-2 ref and genomes outside this subgenera. There also appears to be some degree of genera and species separation for bat hosts. The majority of the Sarbecovirus affect the bat genus *Rhinolophus* (column b, light blue, dark blue and purple), whereas a much smaller proportion of the Alphacoronavirus are found in bats of this genus. Some clades overlap with specific bat species, including *Rhinolophus ferrumequinum*, *Rhinolophus sinicus* and *Scotophilus kuhlii*. The results from the analysis made in later parts of this study are also highlighted, including c) codon usage bias clusters, d-f) high impact variants with multiple variants are found in the same amino acid position, g-j) other high impact variants with a single amino acid change found in > 10 genomes, k-l) other high impact variants.

127 found in coronaviruses that can promote ribosomal frameshifting *Baranov et al. (2005)*. The gene  
 128 sequences generated by PROKKA and BLAST (E and ORF10) were used for downstream analysis,  
 129 including gene-gene network graph, codon usage bias analysis, and a gene-presence summary  
 130 table. The gene-presence summary table notates whether SARS-CoV ref genes were found ( $\geq$   
 131 80% and  $\geq$  50% sequence coverage) in each genome; this table is available in the GitHub project  
 132 [https://github.com/coronahack2020/final\\_paper/tree/master/host-data](https://github.com/coronahack2020/final_paper/tree/master/host-data). Supplementary files for each  
 133 host (in each folder) are named as \*\_genome\_metrics.csv.

### 134 **Gene Relationship Network Graph**

135 A gene-gene similarity network analysis was used to compare genes across SARS-CoV-2, bat-CoV  
136 and pangolin-CoV. The advantage of using a 3D network approach to visualise this information was  
137 that it simplifies complex information as patterns. Genes sharing high similarity form independent  
138 clusters. In cases where there is a high degree of dissimilarity in a gene for different host species,  
139 a pattern of 2 or more distinct clusters would take place, with each cluster comprised of genes  
140 derived from samples of the same host-species. In genes where there is a medium level of dissimi-  
141 larity across host-species, two or more cluster would appear fused and potentially break apart into  
142 distinct clusters if the edge threshold were increased. Both of these patterns are observed within  
143 this dataset. Distinct separation by host species are seen in ORF1a, ORF3a, ORF6, ORF7a, ORF8  
144 and S (Figure 2). The strongest host-species separation observed were between SARS-CoV-2 and  
145 bat-CoV; pangolin-CoV always group closer to SARS-CoV-2 than to bat-CoV. In the cases of ORF3a,  
146 ORF8 and S, complete separation was observed between bat-CoV and human SARS-CoV-2 (Figure  
147 2B & C). One bat-CoV genome, RaTG13, was more similar to SARS-CoV-2 and pangolin-CoV than  
148 the remainder of the bat-CoV for S (2C). For ORF3a, three bat genomes (MG772933, MG772934  
149 and MN996532; named bat-SL-CoVZC45, bat-SL-CoVZXC21 and RaTG13 respectively) clustered to-  
150 gether with SARS-CoV-2 and pangolin-CoV rather than with the remainder of the bat genomes (Fig-  
151 ure 2). These same three genomes are the only bat-CoV with ORF8 that co-cluster with SARS-CoV-2  
152 ORF8 under the percentage identity threshold ( $\geq 80\%$ ) set for building the network graph. Other  
153 bat-CoV ORF8 were so distinct from SARS-CoV-2 ORF8 that they do not co-cluster, even when edge  
154 filtering was removed.

155 To investigate whether if potential gene transfer or recombination that may have come from  
156 more distantly related bat-CoV, we sought for unusual co-clustering between genes characterised  
157 from bat-CoV and SARS-CoV-2. We did not observe such pattern; RaTG13 co-cluster with SARS-CoV-  
158 2 for many genes, but it is also the most similar bat-CoV to SARS-CoV-2 at a genome level.

159 Two additional genes identified by PROKKA, Corona FSE, a non-coding frame-shift stimulation  
160 element within ORF1ab and s2m, a stem-loop II-like motif *Robertson et al. (2004)* have both been  
161 shown to be highly conserved and important for SARS-2-like coronaviruses. s2m has been identi-  
162 fied as a mobile genetic element which has been described in a number of single-stranded RNA  
163 virus and insect families and has also been shown to be important for viral function *Tengs and*  
164 *Jonassen (2016); Tengs et al. (2020)*.

165 In summary, the use of gene-gene network analysis enables us to determine groups of closely  
166 related genes, which not only highlights genes showing strong host-species separation, but also  
167 characterise clusters of related genes that may be absent or highly different from the reference  
168 genome of interest, such as ORF8. 6 genes, ORF1ab, ORF3, ORF6, ORF7a, ORF8 and S, showed a  
169 strong host-species separation in the network graph. In particular, with the exception of S, where  
170 bat-SL-CoVZC45, bat-SL-CoVZXC21 clustered closer to bat-CoVs, the bat genomes, bat-SL-CoVZC45,  
171 bat-SL-CoVZXC21 and RaTG13, clustered together with SARS-CoV-2 than the remainder of the bat-  
172 CoV for these 5 genes.



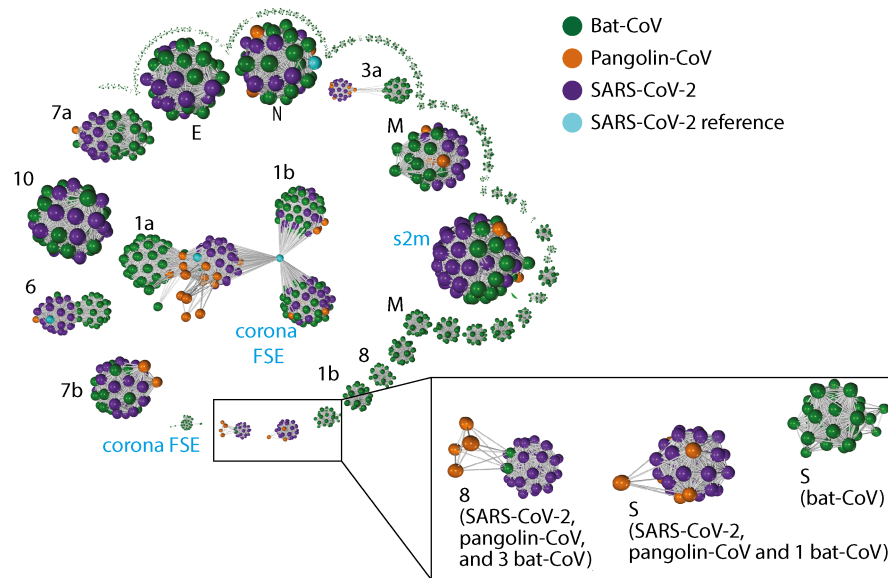

**Figure 2.** Gene-gene similarity network analysis. Each node represents a gene defined by PROKKA or a DNA segment similar to genes from the SARS-CoV-2 reference genome. The nodes were compared against each other using BLAST, and nodes with high similarity (BLAST score  $\geq 60$  and a query coverage  $\geq 80\%$ ) were connected with an edge. The network graph is labelled with host species. The black font in the graph indicates the corresponding SARS-CoV-2 gene names ("ORF" omitted) for the larger clusters, whereas blue font indicates additional non-coding sequences defined by PROKKA. Instead of the full length ORF1ab (21k in length), ORF1a and ORF1b were defined by PROKKA as two separate genes. Notably ORF1a, ORF3a, ORF6, and ORF8 and S, show strong separations between nodes from different species. ORF8 from 3 bat-CoV co-cluster with ORF8 from SARS-CoV-2 (RaTG13, bat-SL-CoVZC45 and bat-SL-CoVZXC21 respectively). The remaining bat-CoV ORF8 do not co-cluster with SARS-CoV-2 ORF8 even without the edge filtering threshold. For S, the bat-CoV RaTG13 co-cluster with COVID-19 and pangolin. A cluster of bat-CoVs break off for ORF1b and M, suggesting a large amount of variation amongst bat-CoV for these genes.

### 173 RNaseq expression analysis

174 In our exploratory analysis during the Hackathon event, we attempted to capture gene-level ex-  
 175 pression evidence for each of the predicted ORFs. However, following the event, we recognise that  
 176 RNA virus gene expression cannot be captured through standard RNaseq analysis pipeline. We  
 177 have included the results of our analysis in the supplementary section for record purpose only;  
 178 it is an inaccurate estimation of the viral gene expression, as it does not differentiate viral mRNA  
 179 expression from viral genome.

### 180 Codon Usage Bias

181 Codon usage profiling of all representative genes of the SARS-CoV-2 ref separated from human  
 182 host (Wuhan and Charite datasets), bat-CoV and pangolin-CoV was carried out. RSCU were calcu-  
 183 lated for each gene and for all genes that are found in  $>18\%$  of the bat dataset s (E, N, S, ORF1a,  
 184 ORF3a and ORF10) to depict an overall relative synonymous codon usage across genomes from  
 185 the datasets. Principle component analysis (PCA) using RSCU showed a strong host-species sepa-  
 186 ration; the first principle component (PC1) accounts for  $> 90\%$  of the variation (Figure 3a and b).  
 187 Some separation was observed amongst bat-CoVs (Figure 3a & b). K-means clustering was used to  
 188 cluster bat-CoVs using the multiple-gene PCA output (with the exception of MG772933, MG772934  
 189 and MN996532, named bat-SL-CoVZC45, bat-SL-CoVZXC21 and RaTG13 respectively, as they group  
 190 closer to SARS-CoV-2 and pangolin-CoV). The generated clusters, unsurprisingly correspond to dif-  
 191 ferent clades in the phylogenetic tree (Figure 3b and Figure 1c). We have also examined RSCU  
 192 across bat-CoV, pangolin-CoV and SARS-CoV for each gene. Strong host-species separation is seen

193 across all genes. Similar to the PCA done with multiple genes, whilst the majority of the variation  
 194 can be explained by host-species differences, there is also some variation amongst the bat-CoV  
 195 that correspond to the k-means clusters generated from the multi-gene PCA analysis (Supplemen-  
 196 tary Figure 7). A summary of the synonymous codon ratios (the number of codon divided by total  
 197 number of codons coding for the same amino acid), sorted by amino acids, are shown in Supple-  
 198 mentary Figure 9.

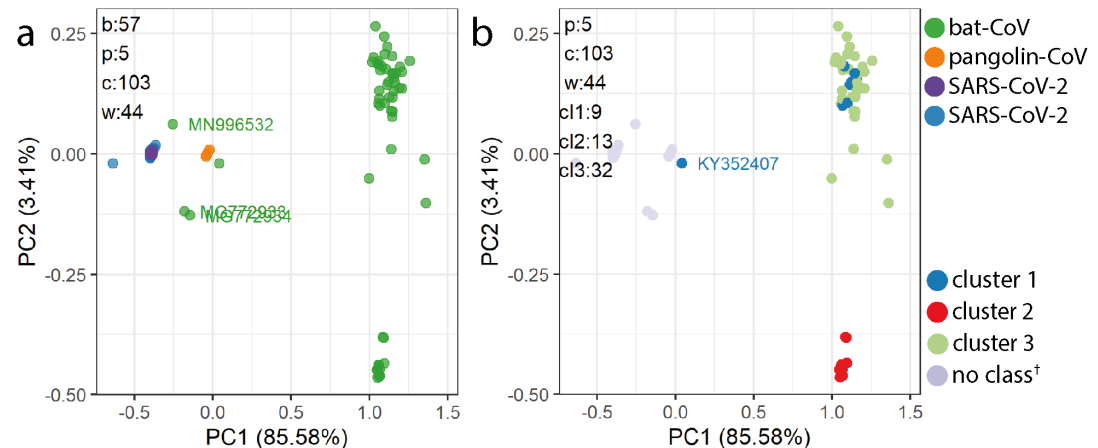

**Figure 3.** A) Principle component analysis was carried out on the relative synonymous codon usage (RSCU) to demonstrate host-species variation in codon usage bias. RSCU was calculated using E, N, S, ORF1ab, ORF3a and ORF10. This analysis only included genomes annotated with all of the listed genes. The majority of the variation (principle component, PC1) can be explained by host-species, with the exception of the three labelled bat-CoV (MG772933, MG772934 and MN996532; named bat-SL-CoVZC45, bat-SL-CoVZXC21 and RaTG13 respectively). B) By using k-means clustering, two distinct clusters were generated from bat-CoV (excluding the 3 distinct bat-CoV highlight in a). A portion of the variation (PC2) reflect the different clades in the phylogenetic tree 1. Both cluster 1 and cluster 2 remains grouped closely together across all genes (with the exception of KY352407. Supplementary Figure 7).

### 199 Variant Analysis

200 Haplotype aware variant calling and variant effect prediction of all genomes in the study has been  
 201 summarised in Figure 4 and supplementary file 1. There are a total of 1,127 variants that are mis-  
 202 sense, inframe deletion, inframe insertion, stop gained, stop lost, as can be seen in Fig 10. We have  
 203 removed missense from further analysis and came to a total of 24 high impact variations in 8 genes  
 204 were when comparing bat-CoV and pangolin-CoV genomes against the SARS-CoV-2 ref. We have  
 205 annotated the majority (with the exception of the NC045512\_27675A>ACAG) of these variation in  
 206 Figure 1, and found that some of these variations, such as variants identified in E, ORF7a and ORF3a,  
 207 appear to exhibit some degree of clade specificity. The only stop gain variant (i.e. NC045512\_29635)  
 208 was present in ORF10 gene of 57 bat-CoV genomes (29635 bp position C>A) which was only rep-  
 209 resenting a synonymous variant in the same position of 6 pangolin-CoV genomes. This variant  
 210 affected 26Y>26\* (Tyrosine to STOP codon TAC>TAA) in bat ORF10. Assuming the direction of host-  
 211 selection from bat and pangolin to human, this variant could explain the presence of a longer  
 212 ORF10 isoform in the 2 latter hosts in comparison to bat-CoV. From the variant table 4, four in-  
 213 frame insertions were identified as follows:

- 214
- 215 • ORF1ab gene at position 9757 (NC045512\_9757 T>TAGA 3164R>3164RR) of all pangolin-Cov
- 216 genomes which represents an extra Arginine.
- 217 • E gene at position 26448 (NC045512\_26448 T>TGAA 68S>68SE) in 33 bat-Cov genomes which
- 218 caused an addition of Glutamine.

- 219 • ORF7a gene at position 27672 (NC045512\_27672 T>TCAC 93V>93VH) in 24 bat-Cov genomes  
 220 by addition of an Histamine.  
 221 • N gene at position 28293 (NC405512z\_28293 A>AACC 7Q>7QP) in 13 bat-Cov genomes by  
 222 addition of a Proline.

223 Two in-frame deletions were also identified in ORF3a and M genes. A single Glutamine deletion in  
 224 ORF3a at position 26,111 was present in 14 bat-Cov genomes (NC045512\_26111 CTGA>C 240PE>240P)  
 225 and a Serine deletion in M gene at position 26,530 (NC045512\_26530 ATTC>A 3DS>3D) was present  
 226 in 57 bat-Cov genomes. The same position showed a missense mutation of 3D>3A (in 2 bat-Cov [bat-  
 227 SL-CoVZC45 and bat-SL-CoVZXC21] and 1 pangolin-Cov) and 3D>3G in 6 pangolin-Cov genomes.

| CHROM     | POS   | REF    | ALT  | VAC | consequence       | gene_name | amino_acid_change | dna_change      | AF         | host         |
|-----------|-------|--------|------|-----|-------------------|-----------|-------------------|-----------------|------------|--------------|
| NC_045512 | 3045  | CAGA   | C    | 2   | inframe_deletion  | ORF1ab    | 927PD>927P        | 3045CAGA>C      | 0.01739130 | Bat          |
| NC_045512 | 9757  | T      | TAGA | 6   | inframe_insertion | ORF1ab    | 3164R>3164RR      | 9757T>TAGA      | 0.05217391 | Pangolin     |
| NC_045512 | 10983 | AAAG   | A    | 2   | inframe_deletion  | ORF1ab    | 3573KR>3574K      | 10983AAAG>A     | 0.01739130 | Bat          |
| NC_045512 | 10993 | C      | CGTT | 2   | inframe_insertion | ORF1ab    | 3576I>3575IV      | 10993C>CGTT     | 0.01739130 | Bat          |
| NC_045512 | 26111 | CTGA   | C    | 14  | inframe_deletion  | ORF3a     | 240PE>240P        | 26111CTGA>C     | 0.12173913 | Bat          |
| NC_045512 | 26447 | C      | CTGA | 5   | inframe_insertion | E         | 68S>68SD          | 26447C>CTGA     | 0.04347826 | Bat          |
| NC_045512 | 26448 | T      | TGAG | 16  | inframe_insertion | E         | 68S>68SE          | 26448T>TGAG     | 0.13913043 | Bat          |
| NC_045512 | 26448 | T      | TGAA | 33  | inframe_insertion | E         | 68S>68SE          | 26448T>TGAA     | 0.28695652 | Bat          |
| NC_045512 | 26448 | T      | TCAA | 2   | inframe_insertion | E         | 68S>68SQ          | 26448T>TCAA     | 0.01739130 | Bat          |
| NC_045512 | 26530 | ATTC   | A    | 57  | inframe_deletion  | M         | 3DS>3D            | 26530ATTC>A     | 0.49565217 | Bat-Pangolin |
| NC_045512 | 27289 | GATTAC | GAC  | 7   | inframe_deletion  | ORF6      | 30DY>30D          | 27289GATTAC>GAC | 0.06086957 | Bat          |
| NC_045512 | 27291 | TTAC   | T    | 2   | inframe_deletion  | ORF6      | 30DY>30D          | 27291TTAC>T     | 0.01739130 | Bat          |
| NC_045512 | 27671 | T      | TTTA | 11  | inframe_insertion | ORF7a     | 93V>93VY          | 27671T>TTTA     | 0.09565217 | Bat          |
| NC_045512 | 27671 | T      | TTCA | 10  | inframe_insertion | ORF7a     | 93V>93VH          | 27671T>TTCA     | 0.08695652 | Bat          |
| NC_045512 | 27672 | T      | TCAC | 24  | inframe_insertion | ORF7a     | 93V>93VH          | 27672T>TCAC     | 0.20869565 | Bat          |
| NC_045512 | 27672 | T      | TTAC | 8   | inframe_insertion | ORF7a     | 93V>93VY          | 27672T>TTAC     | 0.06956522 | Bat          |
| NC_045512 | 27672 | T      | TCAG | 2   | inframe_insertion | ORF7a     | 93V>93VQ          | 27672T>TCAG     | 0.01739130 | Bat          |
| NC_045512 | 27675 | A      | ACAG | 2   | inframe_insertion | ORF7a     | 94Q>94QQ          | 27675A>ACAG     | 0.01739130 | Bat          |
| NC_045512 | 28291 | C      | CCAA | 3   | inframe_insertion | N         | 6P>6PQ            | 28291C>CCAA     | 0.02608696 | Bat          |
| NC_045512 | 28293 | A      | AACC | 13  | inframe_insertion | N         | 7Q>7QP            | 28293A>AACC     | 0.11304348 | Bat          |
| NC_045512 | 28293 | A      | AATC | 11  | inframe_insertion | N         | 7Q>7QS            | 28293A>AATC     | 0.09565217 | Bat          |
| NC_045512 | 28987 | CCAA   | C    | 2   | inframe_deletion  | N         | 238GQ>239G        | 28987CCAA>C     | 0.01739130 | Bat          |
| NC_045512 | 29428 | ACAG   | A    | 7   | inframe_deletion  | N         | 385RQ>385R        | 29428ACAG>A     | 0.06086957 | Bat          |
| NC_045512 | 29635 | C      | A    | 57  | stop_gained       | ORF10     | 26Y>26*           | 29635C>A        | 0.49565217 | Bat          |

**Figure 4.** High impact variants identifies across bat and pangolin genomes using the variant calling pipeline based on SARS-Cov-2 Ensembl reference genome.



## 228 Discussion

229 During the 5 day hackathon, we endeavoured to utilise the genomic data aggregated by the sci-  
230 entific community and undertook a multifaceted and comprehensive exploration of the genomic  
231 sequences (or “similarities and differences”) of coronaviruses infecting bat and pangolin hosts,  
232 available at the time. We have compared SARS-CoV-2 to all bat-CoV and pangolin-CoV genomes  
233 from the listed data repositories (NCBI, VIPR and Databiology) without selecting for strains to rep-  
234 resent any specific genera, species or sub-strain. Our comparisons spanned across several levels:  
235 whole-genome, genes, codons and individual variants.

236 The phylogenetic tree inferred from all genomes studied in this manuscript presents a picture  
237 of vast bat-CoV diversity and its topology is similar to those of previous studies carried out on  
238 pangolin and bat coronaviruses when compared to the SARS-CoV-2 genome *Lopes et al. (2020)*.  
239 Previous phylogenetic profiling has noted that RaTG13 (bat-CoV) bares the closest resemblance  
240 to SARS-CoV-2 using 14 SARS-CoV-2 and 55 non-SARS-CoV-2 coronavirus genomes *Fahmi et al.*  
241 *(2020)*. In this study, we have investigated a more expansive set of bat-CoV genomes, and included  
242 pangolin-CoV genomes. RaTG13 remains the closest to SARS-CoV-2 at the whole-genome level, al-  
243 though all 7 pangolin-CoV genomes are more closely related to SARS-CoV-2 than the remaining  
244 214 bat-coronavirus (Figure 1). This relationship has previously been reported and a recombina-  
245 tion event between pangolin-CoVs and RaTG13 has been theorised *Xiao et al. (2020)*. The RaTG13  
246 coronavirus found in horseshoe bats, as with SARS-CoV-2, is a member of the coronaviridae sub-  
247 genus Sarbecovirus, has been suggested to be the closest relative to SARS-2 in a number of studies  
248 *Li et al. (2020b)*. The origin of SARS-CoV-2 is still unknown and a number of coronaviruses from  
249 different hosts have been proposed *Lau et al. (2020)*; *Malaiyan et al. (2020)*. Bats are often linked  
250 to SARS-like viruses capable of zoonotic host transfer due to their unique niche as viral reservoirs,  
251 meaning that they are relatively unaffected by viral loads and their natural proximity to human  
252 habitation *Li et al. (2005)*; *Banerjee et al. (2019)*. Recombination has been suggested as an av-  
253 enue for host-transfer for a number of RNA viruses such as SARS-CoV-1 and MERS *Su et al. (2016)*.  
254 More recently, evidence has also been found for inter-host recombination events in a SARS-CoV-2  
255 patient, which may have lead to new traits such as increased virulence from multiple strains *Yi*  
256 *(2020)*.

257 In the attempts to address the potential recombination events or gene transfers between a  
258 strain distantly related to SARS-CoV-2 and a strain more closely related to SARS-CoV-2, we sought  
259 to annotate, characterise and compare genes from our diverse sets of coronaviruses. RNA virus  
260 genomes are often compact, with little intergenic distance between genes, even those of the Coro-  
261 naviridae family which are regarded to have the largest RNA viral genomes. This makes accurate  
262 annotation a difficult task, especially for frame-shift utilising genes and the distinction of what is  
263 produced as final protein product. We initially encountered a number of problems while perform-  
264 ing genome annotation, where a number of contemporary gene prediction methodologies failed  
265 to identify ORF10 in any of our datasets, except for 5 pangolin-CoV genomes. Furthermore, the  
266 DNA sequence representing ORF10 in SARS-CoV-2, which was previously reported as having no  
267 homology to any known sequence in public databases *Koyama et al. (2020)*, has now been found  
268 in previous examples of coronaviruses infecting both pangolins and bats with very high sequence  
269 similarity ( $\geq 90\%$ ) *Zhang et al. (2020)*. With the utilisation of BLAST, ORF10 was found in 162 out of  
270 the 163 of all the SARS-CoV-2 (1 genome contained low quality regions), all pangolin-CoVs and 59  
271 bat-CoV genomes. On the other hand, we initially found only 3 bat-CoV (RaTG13, bat-SL-CoVZC45  
272 and bat-SL-CoVZXC21) ORF8 representatives when comparing PROKKA characterised sequences  
273 against SARS-CoV-2 genes and identified no additional sequences through BLAST. However, with  
274 the use of gene-gene network analysis, we noted that this apparent absence of ORF8 was due to  
275 the very low percentage similarity between most bat-CoV ORF8 and SARS-CoV-2 ORF8; the network  
276 analysis showed a cluster of 38 bat-CoV ORF8 that strongly correlated to each other. Ceraolo et  
277 al. (2020) have shown that ORF8 from RaTG13 shares 94% protein identity to SARS-CoV-2, whilst

278 those of other bat-betacoronaviruses show <60% similarity *Ceraolo and Giorgi (2020)*. Further-  
279 more, Pereira (2020) has shown ORF8 orthologues are present outside betacoronaviruses lineage B  
280 (subgenus Sarbecovirus) *Pereira (2020)*. Interestingly, the 3 bat-CoV ORF8 genes were more similar  
281 to SARS-CoV-2 than the majority of the pangolin-CoV ORF8 representatives; 4 of the 5 pangolin-  
282 CoV ORF8 genes only joined to the ORF8 cluster through the bat-CoV ORF8 in our network analysis.  
283 There were only 4 proteins with 80-100% identity and 100% coverage identified by BLAST searches  
284 against ORF8 using the NCBI and UniProtKB/Protein databases *Mohammad et al. (2020)*. Two of  
285 these proteins were bat-CoV (RaTG13 and Bat-SL-CoVZC45), while the other two were pangolin-CoV;  
286 all four genomes were present in our dataset and we have also observed this high similarity in ORF8.  
287 The exact function of ORF8 remains to be elucidated, although studies on ORF8 from SARS-CoV-2  
288 and ORF8ab and ORF8b from SARS-CoV-1 have suggested a role in immune modulation through  
289 the interferon signalling pathway *Li et al. (2020a)*; *Wong et al. (2018)* and induce strong antigen  
290 response *Hachim et al. (2020)*. Although the origin or function of the SARS-related coronavirus  
291 ORF8 remains unresolved, a 29-nucleotide deletion in ORF8 is often found in SARS-CoV-1, when  
292 compared to civet-CoV, suggesting that ORF8 may be important for interspecies transmission *Lau*  
293 *et al. (2015)*. In post-pandemic studies of the SARS-CoV-1 coronavirus, deletions in specific genome  
294 domains found in samples from human and mammalian hosts were identified as being possible  
295 conduits for early human infection *Consortium et al. (2004)*.

296 Other genes that show strong host-species separation in the gene-gene network analysis in-  
297 clude ORF1a, ORF3a, ORF6 and S. In contrast to ORF8, where the three bat-CoV were more similar to  
298 SARS-CoV-2 than pangolin-CoV, pangolin-CoV and SARS-CoV-2 S protein were more similar to each  
299 other (97.5%), than those of RaTG13 and SARS-CoV-2 (95.4%) *Zhang et al. (2020)*. This is significant  
300 as the S protein plays an important role in the initial penetration and infection of host cells *Wrapp*  
301 *et al. (2020)*. Several human coronaviruses, including SARS-CoV-2, SARS-CoV-1 and human coron-  
302 avirus NL63 (hCoV-NL63), enters the host cells by binding to the host cell angiotensin-converting  
303 enzyme 2 (ACE2) through the receptor binding domain (RBD) of S protein *Wu et al. (2011)*; *Hoff-*  
304 *mann et al. (2020)*. Host-cell receptor recognition is one of the determining factors of host-cell  
305 tropism and the co-evolutionary struggle between viruses and their hosts has likely involved a  
306 number of exchanges of genetic information during long periods of interaction of pathogen and  
307 host-cell contact *Baranowski et al. (2001, 2003)*. Viruses have been shown to have high degrees  
308 of flexibility in their receptor usage and poses capacity to reach efficient binding through muta-  
309 tions *Baranowski et al. (2001, 2003)*. By altering the amino acids within the RBD of SARS-CoV-1,  
310 Qu et al. (2005) has noted that a single amino acid substitution reduces the binding affinity, and  
311 two amino acid substitution almost abolishes its infection of human cells *Qu et al. (2005)*. More-  
312 over, by substituting these amino acids civet-CoV for those from SARS-CoV-1 enabled the modified  
313 civet-CoV to infect human ACE-2 expressing cells *Qu et al. (2005)*. This illustrates the importance  
314 and complexity of S in cross-species infectivity. Nonetheless, it would appear that despite the S  
315 protein being more similar between pangolin-CoVs and SARS-CoV-2, as compared to SARS-CoV-2  
316 versus bat-CoVs, the S protein in RaTG13 on the whole is still more similar to that of SARS-CoV-2  
317 than to those of all other bat-CoVs in this study (Figure 2C). This supports the theory that neither  
318 a currently sequenced pangolin-CoV or bat-CoV are the most recent ancestor of SARS-CoV-2.

319 In addition to examining the overall sequence similarity of between genes derived from bat-CoV,  
320 pangolin-CoV and SARS-CoV-2, we have also examined the codon usage within and across genes.  
321 Codon usage bias across the species-host range may show signs of preferential codon mutation  
322 which have occurred during the complex process of host interaction and transfer *Jitobaom et al.*  
323 *(2020)*; *Kumar et al. (2018)*. The knowledge of nucleotide profiles and subsequent codons during  
324 the human-virus co-evolution could be invaluable to the design of vaccines and their continuous de-  
325 velopment over the years to come *Rice et al. (2020)*. We have demonstrated a strong host-species  
326 separation in the overall codon usage when combining multiple genes (E, N, S, ORF1a, ORF3a and  
327 ORF10) in the analysis. There is very little variation in codon usage bias within the SARS-CoV-2 iso-  
328 lates. However, all pangolin-CoVs and the 3 bat-CoVs (bat-SL-CoVZC45 and bat-SL-CoVZXC21 and

329 RatG13) have a more similar codon usage to SARS-CoV-2. The k-means clusters generated from  
330 the PCA using RSCU of multiple genes correspond to clades within the phylogenetic trees and re-  
331 mains intact when compared across each gene individually (Figure 1c and Supplementary Figure 7),  
332 with two clusters aligned with subsets of bat-CoVs isolated from *Rhinolophus ferrumequinum* and  
333 *Rhinolophus sinicus* respectively. When comparing codon usage bias across the host-species at a  
334 gene-level, bat-CoV also appear to be more distinct from SARS-CoV-2 than pangolin-CoV, both with  
335 respect to the percentage similarity and the presence/absence of genes, with the exception of the  
336 3 bat-CoVs (bat-SL-CoVZC45, bat-SL-CoVZXC21, and RaTG13). On the contrary to the codon usage  
337 analysis carried out by Gu et al. (2020), in which the authors has reported that the codon usage  
338 for M in pangolin-CoVs to be more similar to those of SARS-CoV-2 than RatG13 **Gu et al. (2020)**, our  
339 analysis does not suggest this to be the case. This could due to a difference in the range of hosts  
340 included; we have included SARS-CoV-2, pangolin-CoV and bat-CoV, whereas they have additionally  
341 included coronavirus that affects camel, rodent, pigs and other species. Our codon usage analysis  
342 has been restricted to an overall comparison of RSCU across the genomes we have used in this  
343 study, as more detailed breakdown of codon usage bias and CpG dinucleotide have been carried  
344 out elsewhere **Nambou and Anakpa (2020)**; **Alonso and Diambra (2020)**; **Digard et al. (2020)**. Pre-  
345 vious studies has correlated the RSCU of SARS-CoV-2 to those of human genes and found them to  
346 significantly correlate with a large number of human genes, which are enriched in pathway relat-  
347 ing to host response to viral infection **Nambou and Anakpa (2020)**. It has been observed that host  
348 genes sharing similar codon usage as SARS-CoV-2 are downregulated during an infection, poten-  
349 tially through causing an unbalance to the host tRNA pool and thus host protein synthesis **Alonso**  
350 **and Diambra (2020)**. These mechanisms potentially reflect the genome separation we observed  
351 between RSCU of coronavirus affect the different host species.

352 Next, we focused on variants that could potentially have a more profound impact on the struc-  
353 tures of the proteins through the addition or removal of an amino acid, or through early termina-  
354 tion. In this analysis, we have found that only pangolin-CoV and a subset of bat-CoV (Sarbecovirus  
355 or unannotated) were similar enough to the SARS-CoV-2 ref for the sequences to align 1. Popu-  
356 lation level viral mutation is a complex process, involving a number of pressures, and while RNA  
357 viruses often exhibit some of the highest mutation rates of all viruses, conserved variants can ex-  
358 hibit important functional changes such as the ability to evade immunity more efficiently **Sanjuán**  
359 **and Domingo-Calap (2016)**. Unlike the vast majority of RNA viruses, coronaviruses encode a com-  
360 plex RNA-dependent RNA polymerase that has a 3' exonuclease domain **Smith et al. (2014)**, effec-  
361 tively proofreading mutational events and therefore are less error-prone. Therefore the mutations  
362 observed across populations have undergone an error-correction process which means they are  
363 more likely to be functionally beneficial to the virus. We have observed several of such variants  
364 that are at consistent loci across different bat-CoV clades as shown in Figure 1. Some of these  
365 variants are seen in the majority of the bat-CoV samples (which align to SARS-CoV-2 ref), including  
366 a stop-gain for ORF10 and an inframe deletion for M, whilst others, such as the variants seen in  
367 ORF7a and E appear to be clade specific 1. Several of these variants affect the same amino acid po-  
368 sitions, including E (inframe insertion of *Asp* (Aspartic acid), *Glu* (Glutamic acid) or *Gln* (Glutamine)  
369 at at positions 68), N (inframe insertion of *Pro* (Proline) or *Ser* (Serine) at position 7) and ORF7a (in-  
370 frame insertion of *His* Histidine, *Gln* or *Tyr* (Tyrosine) at position 93) 1. Notably, the stop-gain was  
371 identified at amino acid position 26 in ORF10 for 57 of the 59 bat-CoV genomes with ORF10 that  
372 had >80% similarity to the SARS-CoV-2 ref. The absence of this stop codon in the pangolin (which  
373 exhibited synonymous mutations at the same locus) and human adapted viruses could result in  
374 a longer isoform of the ORF10 or fundamental changes in its function and expression levels. In  
375 a previous study of SARS-CoV-2 and pangolin-CoV genomes, position 26 was also identified as a  
376 region of population level variation from *Tyr* and *His* which significantly modifies the secondary  
377 structure of the coil region of the protein **Hassan et al. (2020a)**.

378 There has been little research on ORF10 function, and its expression has been debated over.  
379 Whilst Kim et al. (2020) found little evidence of ORF10 expression (0.000009% of viral junction-

380 spanning reads) in cell culture (Vero cells) *Kim et al. (2020)*, Liu et al (2020) found it to be abundantly  
381 expressed in severe COVID-19 patient cases but barely detectable in moderate cases *Liu et al.*  
382 *(2020)*. Discrepancies in ORF10 expression may be due to differences in the level of infection and  
383 host cell-type used in the studies, however the variants noted, show potential functions due to  
384 host-species-level conservation.

385 Multiple codon insertions and deletions also exist in ORF1ab of pangolin-CoV and bat-CoV  
386 genomes, which with the polypeptide coding potential of the gene which covers 2/3 of the genome,  
387 is likely to impact a number of important and complex elements of the virus. Machinery needed  
388 for viral replication and the proofreading subunit required to safeguard coronavirus replication  
389 fidelity, are just two functions of the 16 polypeptides which form after the processing of ORF1ab,  
390 and therefore potentially include several key targets for antiviral drug development *Subissi et al.*  
391 *(2014)*.

392 As opposed to the single ORF10 variant that is observed in the majority of the bat-CoV, we have  
393 observed 3 different amino acid insertions (4 different nucleotide changes) at position 68 of E in 4  
394 different clades of bat-CoVs. The small envelope E protein is the smallest of coronaviruses' major  
395 structural proteins, but also one of the least described *Schoeman and Fielding (2019)*. E has been  
396 shown to be highly expressed inside infected cells and the viruses which are formed without E, ex-  
397 hibit reduced levels of viral maturation and tropism. Expression of the E product was essential for  
398 virus release and spread, thus demonstrating the importance of E in virus infection and therefore  
399 vaccine development *DeDiego et al. (2007)*. The 68th amino acid position we highlight in this study  
400 is in the c-terminal domain, this coincides with the previously reported motif in SARS-CoV-1 (also at  
401 68th amino acid position) that binds to the host cell PALS1 protein to facilitate infection *Teoh et al.*  
402 *(2010)*.

403 Less than 0.5% of 3,617 SARS-CoV-2 genomes have been found to have non-synonymous mu-  
404 tation in E, and of these, 20% are at the 68th amino acid position *Hassan et al. (2020b)*. These  
405 changes in amino acid may alter the hydrophobicity at the locus, thus possibly influencing the pro-  
406 tein functions and interactions *Hassan et al. (2020b)*. Two of the E variants we highlighted uses  
407 different codons for the same amino acid (GAG or GAA for *Glu*), which potentially suggest interplay  
408 between the selection pressures of codon optimisation and amino acid insertion into the protein  
409 product.

410 We have characterised a number of inframe insertion at amino acid position 93 in ORF7a across  
411 55 bat-CoV genomes, and at position 94 reported in 2. As with position 68 in E, position 93 in  
412 ORF7a has multiple codon insertions coding for the same amino acid but in two groups. In these  
413 two groups of bat-CoVs, an additional *His* is encoded for by two different codons and secondly, so  
414 is *Tyr* in another group. Intriguingly, ORF7a in SARS-CoV-1 has been shown to regulate the bone  
415 marrow stromal antigen 2 (BST-2) which inhibits the release of virions human infecting viruses  
416 *Taylor et al. (2015)*.

417 N is another gene that we have shown multiple inframe insertion variants for the same amino  
418 acid position. The N protein is highly expressed during an infection, and plays a key role in pro-  
419 moting viral RNA synthesis and incorporating genomic RNA into progeny viral particles *Cong et al.*  
420 *(2020)*. In gene N, We observed two inframe insertions at amino acid position 7 for *Ser* or *Pro* from  
421 two groups of bat-CoVs (13 and 11 respectively), as well as two inframe deletions at positions 238  
422 and 385. For M in 57 bat-CoV and pangolin-CoV, there is an inframe deletion at position 3, which  
423 removed the amino acid *Ser*. At this amino acid position, a missense mutation of (*Asp*) to *Arg* is  
424 seen in 2 bat-CoV (bat-SL-CoVZC45 and bat-SL-CoVZXC21) and 1 pangolin-Cov, and (*Asp*) to Glycine  
425 (*Gly*) in 6 pangolin-Cov genomes. These same two bat-CoV have been shown to be more similar  
426 to SARS-CoV-2 than other bat-CoV on other comparative metrics. M plays an important role in its  
427 interactions with both E and S to incorporate virions into the host-cells, thus any mutation in either  
428 gene may cause a number of causalities across all.

429 As opposed to the majority of the identified variants, ORF6 only exhibits 2 different inframe  
430 deletions in position 30, which remove the same amino acid *Tyr*.

431 These amino acid positions we have highlighted through our variant analysis may constitute  
432 important differences in the function or folding potential of the protein product. We have sum-  
433 marised these in Figure 1. These naturally occurring variants we observed across bat-CoV and  
434 pangolin-CoV may be associated with selection advantage, such as virulence or the efficiency in-  
435 fect a specific host species.

436 Weber et al. (2020) have interrogated 572 SARS-CoV-2 genomes from worldwide and charac-  
437 terised 10 distinct mutation hotspots that have been found in up to 80% of the viral genomes they  
438 examined *Weber et al. (2020)*. Whilst our reported amino acid positions do not coincide with the 10  
439 hotspots they have reported, some of the genomes they examined display changes on or adjacent  
440 to our reported positions

441 Through employing a number of genomic analysis methodologies, this study has aimed to bring  
442 understanding of the diversity across SARS-CoV-2 and SARS-CoV-2-like coronaviruses by comparing  
443 a wide selection of available genomes from the starting point of the pandemic. We have highlighted  
444 high degree of host-species separation in ORF3a, ORF6, ORF7a, ORF8 and S, as well as in codon  
445 usage. A number of amino acid positions that demonstrates high impact variants (inframe inser-  
446 tion/deletion or stop gain) have also been identified in various bat-CoV and pangolin-CoV; these  
447 are potentially functionally important positions of the protein and warrants further research.

## 448 Methods

### 449 Genomes

450 Historically, genomes held in public databases have been fragmentary, resulting in multiple collec-  
451 tions with overlapping examples with alternative naming schemes and annotations. Fortunately, a  
452 large collection of virus genomes of the Coronaviridae family (Coronavirus) deposited in databases  
453 such as the Virus Pathogen Resource (ViPR) *Pickett et al. (2012)* have been provided with both ge-  
454 nomic sequence and metadata which has been examined for redundancy and comparative anno-  
455 tation. Coronavirus genomes isolated from humans, bats and pangolins used in this study were  
456 collected from multiple repositories and grouped by their host and source. The databases and  
457 groups are listed in table 2.

| Host-Source                        | No. Genomes | Database                                 |
|------------------------------------|-------------|------------------------------------------|
| SARS-CoV-2 Wuhan isolates          | 20          | <a href="#">DataBiology</a>              |
| SARS-CoV-2 Wuhan isolates          | 26          | GISAID-Charite <i>Elbe et al. (2017)</i> |
| SARS-CoV-2 German isolates         | 117         | GISAID-Charite <i>Elbe et al. (2017)</i> |
| SARS-CoV-2 Ensembl Wuhan Reference | 1           | Ensembl <i>Yates et al. (2020)</i>       |
| Bat                                | 139         | <a href="#">DataBiology</a>              |
| Bat                                | 76          | ViPR <i>Pickett et al. (2012)</i>        |
| Pangolin                           | 5           | <a href="#">DataBiology</a>              |
| Pangolin                           | 2           | NCBI <i>Coordinators (2018)</i>          |

**Table 2.** Coronavirus genomes were collected from the various database resources listed by host and source categories. Using taxonomic data made available by the Virus Pathogen Database and Analysis Resource (ViPR) *Pickett et al. (2012)*, 70 bat-CoVs were identified as *Betacoronavirus* and 84 were *Alphacoronavirus*. 5 pangolin-CoVs were identified as *Betacoronavirus*. The remaining bat-CoV and pangolin-CoV genomes did not have a family identification. These were downloaded in May 2020 and consisted of the contemporary available and open datasets at the time. All genomes and their respective ID's are currently available through NCBI (Oct 2020). In cases where two groups contained the same genome (Possibly with a different name), only one representative was taken.

### 458 Genome Annotation

459 RNA viruses such as SARS and other coronaviruses have been characterised as having the ability  
460 to utilise ribosomal programmed frameshifting for a number of important genes *Dinman (2010)*.



461 Identification of such genes is complex and often requires high quality RNA expression evidence.  
462 Due to this and the complexity of genome annotation, especially in novel viral genomes such as  
463 SARS-CoV-2, two approaches were taken to identify the set of genes for each of the genomes  
464 in this study. In this regard, for defining genes, we first employed PROKKA (Rapid Prokaryotic  
465 Genome Annotation) to curate the genes for each of the coronavirus genomes. PROKKA utilises  
466 Prodigal *Hyatt et al. (2010)* to initially find ORFs, which ensures that the DNA sequences of the  
467 genes found are in-frame and contain the correct amino acid coding potential. Prodigal is an un-  
468 supervised *ab initio* prediction method and therefore does not rely on previous knowledge to pre-  
469 dict ORFs, which, unlike sequence homology based tools such as BLAST, does not require previ-  
470 ously annotated sequence data to identify potential genes within novel genomes. However, to  
471 overcome the limitations and intricacies of contemporary *ab initio* genome annotation techniques,  
472 BLAST was used to identify additional genes with strong homology to those present in the SARS-  
473 CoV-2 reference genome released by Ensembl v100 (SARS-CoV-2 ref) *ASM985889v3 Yates et al.*  
474 *(2020)*(<https://covid-19.ensembl.org>). The additional BLAST annotation was performed with a BLAST  
475 percentage identity threshold of  $\geq 80\%$  are labelled separately where annotation methodologies  
476 may have an impact. This combined approach was used to avoid solely relying on either method,  
477 especially BLAST's agnostic approach to coding frame detection.

### 478 **Phylogenetic Trees**

479 A Phylogenetic tree was produced from the genomes of the SARS-CoV-2 Wuhan isolates, Ensembl  
480 Wuhan reference and the bat and pangolin coronaviruses to examine their evolutionary relation-  
481 ships at the genomic level. Clustal Omega 1.2.4 *Sievers and Higgins (2018)* was used to perform a  
482 multiple sequence alignment for each of the genomes with default parameters. The phylogenetic  
483 tree was inferred from the multiple sequence alignment with RAXML *Stamatakis (2014)* using de-  
484 fault parameters apart from the GTRGAMMA option and bootstrapping set to 20. The plotted using  
485 packages in R. Midpoint-root and ladderized were carried out using phytools *Revell (2012)* and ape  
486 *Paradis and Schliep (2019)*, and ggtree *Yu (2020)* was used for the visualisation. The subgenus infor-  
487 mation for Betacoronavirus were curated and clades labelled based on consensus of the majority  
488 (i.e. if  $> 85\%$  of the samples in the clade are labelled and have the same subgenus annotation).  
489 For labelling the bat-CoVs host genera and species information, a list of host genera and species  
490 are curated. Host species with  $>10$  bat-CoV genomes were labelled, followed by host genera with  
491 more  $> 10$  bat-CoV genomes. The remaining bats were grouped into a single group "other".

### 492 **Gene Relationship Network Graph**

493 Genes identified by PROKKA from each host-set were collated and together with the additional  
494 sequences from the BLAST-alignment to the SARS-CoV-2 ref genome as aforementioned, an all-  
495 against-all comparison was made with BLAST. This was done with all gene sequences as both the  
496 reference and the query as input. A network graph was generated using Graphia Enterprise *Free-*  
497 *man et al. (2020)* by treating each gene as a node and generating edges between nodes with signif-  
498 icant BLAST alignments. A significant BLAST alignment was defined to have a BLAST score  $\geq 60$ , a  
499 query coverage  $\geq 80\%$  and a percentage identity  $\geq 80\%$ . Components with less than 5 nodes were  
500 removed from the graph. The same procedure was carried out using amino acid sequences as  
501 input (Supplementary Figure 5). Where the amino acid sequences were not generated by PROKKA,  
502 the matched sequences extracted from BLAST were translated into amino acid sequences, pro-  
503 vided that the sequences contained the start and stop codons.

### 504 **Codon Usage**

505 Codon usage metrics for every gene in the SARS-CoV-2 reference gene catalogue were calculated  
506 in all available genome sets. Gene sequence output of the PROKKA and BLAST searches (where cor-  
507 rect frame was present) were collated and BLAST searched against the SARS-CoV-2 ref genes; genes  
508 that have a BLAST result were included and annotated with the SARS-CoV-2 gene. For each set of



509 genes annotated with an SARS-CoV-2 gene, those substantially shorter than the average ( $<$  mean  
510 length - 2 standard deviation) were removed from codon usage analysis. Custom Python scripts  
511 (available on Github ([https://github.com/coronahack2020/final\\_paper.git](https://github.com/coronahack2020/final_paper.git))) were used to summarise  
512 the frequencies of each of the codons. Non-standard codons, start, stop codons were discarded,  
513 along with the codon TGG as it is the only codon coding for tryptophan.

514 Relative synonymous codon usage (RSCU) was calculated as the ratio of the observed frequency  
515 of codon to the expected frequency under the assumption of equal usage between synonymous  
516 codons for the same amino acids *Sharp et al. (1986)*.

### 517 **Variant Analysis**

518 For this analysis, we aim to highlight naturally occurring and population-wide viable variants, de-  
519 fined as being different to the SARS-CoV-2 ref and have an impact on coding potential. Variant  
520 calling was carried out for all available genome sets against the reference SARS-CoV-2 genome  
521 released by Ensembl v100 *ASM985889v3*. The allelic counts and variant effect prediction was car-  
522 ried out in order to identify variants with high impact changes (inframe deletion, inframe insertion,  
523 frameshift, or stop gain) within or between viruses collected from different host species.

524 Briefly, multiple genome fasta input files were mapped against the SARS-CoV-2 ref assembly  
525 using minimap2 *Li (2018)* with the following flags (minimap2 -cs -cx asm20 INPUT REF > OUT.paf).  
526 The generated PAF (pairwise alignment format) files were subsequently used for variant calling  
527 through the paftools.js module in minimap2 (sort -k6,6 -k8,8n OUT.paf | paftools.js call -l 200 -L  
528 200 -q 30 -f REF.fa). Haplotype aware variant consequences were generated using VEP (Variant  
529 Effect Predictor) *McLaren et al. (2016)* *den Dunnen et al. (2016)*) and BCFtools/csq *Danecek and*  
530 *McCarthy (2017)*. The complete set of scripts for this pipeline can be found in [https://github.com/](https://github.com/coronahack2020/final_paper.git)  
531 [coronahack2020/final\\_paper.git](https://github.com/coronahack2020/final_paper.git).

### 532 **Expression Analysis**

533 The RNASeq dataset (n=4) was obtained from the publicly available project PRJCA002326 at Na-  
534 tional Genomic Data Centre of Beijing Genomics Institute.

535 The details of the samples can be found in <https://bigd.big.ac.cn/bioproject/browse/PRJCA002326>.  
536 Briefly, total RNA were extracted from broncho-alveolar flush (BALF) samples of two COVID-19 pa-  
537 tients treated at the Wuhan University Hospital (Wuhan, China). Ribosomal depletion was carried  
538 out, followed by 150bp pair-end sequencing with an 145bp insert size using Illumina MiSeq. After  
539 trimming the raw reads using Trimmomatic v.0.39 *Bolger et al. (2014)*, a Kallisto index was built  
540 based on cDNA fasta obtained from Ensembl v100 *ASM985889v3*. After mapping the read to tran-  
541 scriptome (CDS) level fasta file using Kallisto, the transcript level abundance (TPM) was extracted  
542 and visualised in R v.4.0.0 *R Core Team (2020)*.

### 543 **Code Availability**

544 All the code base used during the hackathon and production of this manuscript is available on:  
545 [https://github.com/coronahack2020/final\\_paper.git](https://github.com/coronahack2020/final_paper.git)

### 546 **Data Availability**

547 VCFfiles are available on: [https://github.com/coronahack2020/final\\_paper/tree/master/alignment\\_](https://github.com/coronahack2020/final_paper/tree/master/alignment_variant_calling)  
548 [variant\\_calling](https://github.com/coronahack2020/final_paper/tree/master/alignment_variant_calling)

### 549 **Competing interests**

550 The authors declare that they have no competing interests.

## 551 **Author's contributions**

552 Study design, analysis and code development was carried out by Nicholas J Dimonaco (NJD) , Bar-  
553 bara B. Shih (BBS), David A. Parry (DAP) and Mazdak Salavati (MS). The manuscript was drafted by  
554 NJD, BBS and MS.

## 555 **Acknowledgements**

556 This study was carried out with support from DataBiology, MindStreamAI, University of Edinburgh,  
557 The Roslin Institute Royal (Dick) School of Veterinary Studies, Institute of Genetics and Molecular  
558 Medicine and University of Aberystwyth. Authors of this manuscript were members of the team  
559 who one the 3rd joint position in [CORONAHACK2020 virtual hackathon](#). The prize of the Hackathon  
560 sponsored by Slack, Fluidstack, Episode 1, Scan Computers, DataBiology, NVIDIA and MindStream-  
561 mAI (£500) was used towards publication fees of this manuscript.

562 NJD was awarded the Rhiannon Powell Science Bursary by the Old Students' Association of  
563 Aberystwyth University in support of his contribution to the manuscript. Please refer to this link  
564 for the details of the event: <https://www.coronahack.co.uk/> Thanks to Dr Samantha Lycett, Roslin  
565 Institute for comments on the manuscript. BBS is supported by a BBSRC Core Capability Grant  
566 (BB/CCG1780/1) to the Roslin Institute.

## 567 **References**

- 568 **Alonso AM**, Diambra L. SARS-CoV-2 Codon Usage Bias Downregulates Host Expressed Genes With Similar  
569 Codon Usage. *Frontiers in Cell and Developmental Biology*. 2020; 8:831. [https://www.frontiersin.org/article/](https://www.frontiersin.org/article/10.3389/fcell.2020.00831)  
570 [10.3389/fcell.2020.00831](https://www.frontiersin.org/article/10.3389/fcell.2020.00831), doi: [10.3389/fcell.2020.00831](https://doi.org/10.3389/fcell.2020.00831).
- 571 **Altschul SF**, Gish W, Miller W, Myers EW, Lipman DJ. Basic local alignment search tool. *Journal of molecular*  
572 *biology*. 1990; 215(3):403–410.
- 573 **Amer H**, Alqahtani AS, Alzoman H, Algerian N, Memish ZA. Unusual presentation of Middle East respiratory  
574 syndrome coronavirus leading to a large outbreak in Riyadh during 2017. *American journal of infection*  
575 *control*. 2018; 46(9):1022–1025.
- 576 **Banerjee A**, Kulcsar K, Misra V, Frieman M, Mossman K. Bats and coronaviruses. *Viruses*. 2019; 11(1):41.
- 577 **Baranov PV**, Henderson CM, Anderson CB, Gesteland RF, Atkins JF, Howard MT. Programmed ribosomal  
578 frameshifting in decoding the SARS-CoV genome. *Virology*. 2005; 332(2):498–510.
- 579 **Baranowski E**, Ruiz-Jarabo CM, Domingo E. Evolution of cell recognition by viruses. *Science*. 2001;  
580 292(5519):1102–1105.
- 581 **Baranowski E**, Ruiz-Jarabo CM, Pariente N, Verdaguer N, Domingo E. Evolution of cell recognition by viruses:  
582 a source of biological novelty with medical implications. *Advances in virus research*. 2003; 62:19.
- 583 **Bolger AM**, Lohse M, Usadel B. Trimmomatic: a flexible trimmer for Illumina sequence data. *Bioinformat-*  
584 *ics (Oxford, England)*. 2014 apr; 30(15):2114–20. [http://www.pubmedcentral.nih.gov/articlerender.fcgi?artid=](http://www.pubmedcentral.nih.gov/articlerender.fcgi?artid=4103590&tool=pmcentrez&rendertype=abstract)  
585 [4103590&tool=pmcentrez&rendertype=abstract](http://www.pubmedcentral.nih.gov/articlerender.fcgi?artid=4103590&tool=pmcentrez&rendertype=abstract), doi: [10.1093/bioinformatics/btu170](https://doi.org/10.1093/bioinformatics/btu170).
- 586 **Boni MF**, Lemey P, Jiang X, Lam TTY, Perry B, Castoe T, Rambaut A, Robertson DL. Evolutionary origins of the  
587 SARS-CoV-2 sarbecovirus lineage responsible for the COVID-19 pandemic. *bioRxiv*. 2020; [https://www.biorxiv.](https://www.biorxiv.org/content/early/2020/03/31/2020.03.30.015008)  
588 [org/content/early/2020/03/31/2020.03.30.015008](https://www.biorxiv.org/content/early/2020/03/31/2020.03.30.015008), doi: [10.1101/2020.03.30.015008](https://doi.org/10.1101/2020.03.30.015008).
- 589 **Ceraolo C**, Giorgi FM. Genomic variance of the 2019-nCoV coronavirus. *Journal of medical virology*. 2020;  
590 92(5):522–528.
- 591 **Chen F**, Wu P, Deng S, Zhang H, Hou Y, Hu Z, Zhang J, Chen X, Yang JR. Dissimilation of synonymous codon usage  
592 bias in virus–host coevolution due to translational selection. *Nature ecology & evolution*. 2020; p. 1–12.
- 593 **Cong Y**, Ulasli M, Schepers H, Mauthe M, V'kovski P, Kriegenburg F, Thiel V, de Haan CA, Reggiori F. Nucleocapsid  
594 protein recruitment to replication-transcription complexes plays a crucial role in coronaviral life cycle. *Journal*  
595 *of virology*. 2020; 94(4).
- 596 **Consortium CSME**, et al. Molecular evolution of the SARS coronavirus during the course of the SARS epidemic  
597 in China. *Science*. 2004; 303(5664):1666–1669.

- 598 **Coordinators NR.** Database resources of the national center for biotechnology information. *Nucleic acids*  
599 *research.* 2018; 46(Database issue):D8.
- 600 **Danecek P, McCarthy SA.** BCFtools/csq: haplotype-aware variant consequences. *Bioinformatics.* 2017 02;  
601 33(13):2037–2039. <https://doi.org/10.1093/bioinformatics/btx100>, doi: 10.1093/bioinformatics/btx100.
- 602 **DeDiego ML, Álvarez E, Almazán F, Rejas MT, Lamirande E, Roberts A, Shieh WJ, Zaki SR, Subbarao K, Enjuanes**  
603 **L.** A severe acute respiratory syndrome coronavirus that lacks the E gene is attenuated in vitro and in vivo.  
604 *Journal of virology.* 2007; 81(4):1701–1713.
- 605 **Digard P, Lee HM, Sharp C, Grey F, Gaunt ER.** Intra-genome variability in the dinucleotide composition of SARS-  
606 CoV-2. *bioRxiv.* 2020; .
- 607 **Dinman JD.** Programmed–1 Ribosomal Frameshifting in SARS Coronavirus. In: *Molecular Biology of the SARS-*  
608 *Coronavirus* Springer; 2010.p. 63–72.
- 609 **den Dunnen JT, Dalgleish R, Maglott DR, Hart RK, Greenblatt MS, McGowan-Jordan J, Roux AF, Smith T, An-**  
610 **tonarakis SE, Taschner PEM.** HGVS Recommendations for the Description of Sequence Variants: 2016 Up-  
611 **date.** *Human Mutation.* 2016; 37(6):564–569. <https://onlinelibrary.wiley.com/doi/abs/10.1002/humu.22981>,  
612 **doi: 10.1002/humu.22981.**
- 613 **Elbe S, Buckland-Merrett G, falkename t, thistoo a.** Data, disease and diplomacy: GISAID’s innovative contribu-  
614 **tion to global health.** *Global Challenges.* 2017; 1(1):33–46.
- 615 **Fahmi M, Kubota Y, Ito M.** Nonstructural proteins NS7b and NS8 are likely to be phylogenetically associated  
616 **with evolution of 2019-nCoV.** *Infection, Genetics and Evolution.* 2020; 81:104272.
- 617 **Freeman T, Horsewell S, Patir A, Harling-Lee J, Regan T, Shih BB, Prendergast J, Hume DA, Angus T.**  
618 **Graphia: A platform for the graph-based visualisation and analysis of complex data.** *bioRxiv.* 2020; **doi:**  
619 **10.1101/2020.09.02.279349.**
- 620 **Gu H, Chu DK, Peiris M, Poon LL.** Multivariate analyses of codon usage of SARS-CoV-2 and other betacoron-  
621 **aviruses.** *Virus Evolution.* 2020; 6(1):veaa032.
- 622 **Hachim A, Kavian N, Cohen CA, Chin AW, Chu DK, Mok CK, Tsang OT, Yeung YC, Perera RA, Poon LL, et al.**  
623 **ORF8 and ORF3b antibodies are accurate serological markers of early and late SARS-CoV-2 infection.** *Nature*  
624 **Publishing Group; 2020.**
- 625 **Hassan SS, Attrish D, Ghosh S, Choudhury PP, Uversky VN, Uhal BD, Lundstrom K, Rezaei N, Aljabali AA, Seyran**  
626 **M, et al.** Notable sequence homology of the ORF10 protein introspects the architecture of SARS-COV-2.  
627 *bioRxiv.* 2020; .
- 628 **Hassan SS, Choudhury PP, Roy B.** SARS-CoV2 envelope protein: non-synonymous mutations and its conse-  
629 **quences.** *Genomics.* 2020; .
- 630 **Hoffmann M, Kleine-Weber H, Schroeder S, Krüger N, Herrler T, Erichsen S, Schiergens TS, Herrler G, Wu NH,**  
631 **Nitsche A, et al.** SARS-CoV-2 cell entry depends on ACE2 and TMPRSS2 and is blocked by a clinically proven  
632 **protease inhibitor.** *Cell.* 2020; .
- 633 **Hung LS.** The SARS epidemic in Hong Kong: what lessons have we learned? *Journal of the Royal Society of*  
634 **Medicine. 2003; 96(8):374–378.**
- 635 **Hyatt D, Chen GL, LoCascio PF, Land ML, Larimer FW, Hauser LJ.** Prodigal: prokaryotic gene recognition and  
636 **translation initiation site identification.** *BMC bioinformatics.* 2010; 11(1):119.
- 637 **of the International CSG, et al.** The species Severe acute respiratory syndrome-related coronavirus: classifying  
638 **2019-nCoV and naming it SARS-CoV-2.** *Nature Microbiology.* 2020; 5(4):536.
- 639 **Jitobaom K, Phakaratsakul S, Sirihongthong T, Chotewutmontri S, Suriyaphol P, Suptawiwat O, Auewarakul P.**  
640 **Codon usage similarity between viral and some host genes suggests a codon-specific translational regulation.**  
641 *Heliyon.* 2020; 6(5):e03915.
- 642 **Kim D, Lee JY, Yang JS, Kim JW, Kim VN, Chang H.** The architecture of SARS-CoV-2 transcriptome. *Cell.* 2020; .
- 643 **Koyama T, Platt D, Parida L.** Variant analysis of SARS-CoV-2 genomes. *Bulletin of the World Health Organization.*  
644 **2020; 98(7).**

- 645 **Kumar N**, Kulkarni DD, Lee B, Kaushik R, Bhatia S, Sood R, Pateriya AK, Bhat S, Singh VP. Evolution of codon  
646 usage bias in Henipaviruses is governed by natural selection and is host-specific. *Viruses*. 2018; 10(11):604.
- 647 **Lau SK**, Feng Y, Chen H, Luk HK, Yang WH, Li KS, Zhang YZ, Huang Y, Song ZZ, Chow WN, et al. Severe acute res-  
648 piratory syndrome (SARS) coronavirus ORF8 protein is acquired from SARS-related coronavirus from greater  
649 horseshoe bats through recombination. *Journal of virology*. 2015; 89(20):10532–10547.
- 650 **Lau SK**, Luk HK, Wong AC, Li KS, Zhu L, He Z, Fung J, Chan TT, Fung KS, Woo PC. Possible bat origin of severe  
651 acute respiratory syndrome coronavirus 2. *Emerging infectious diseases*. 2020; 26(7):1542.
- 652 **Li H**. Minimap2: pairwise alignment for nucleotide sequences. *Bioinformatics*. 2018 05; 34(18):3094–3100.  
653 <https://doi.org/10.1093/bioinformatics/bty191>, doi: 10.1093/bioinformatics/bty191.
- 654 **Li JY**, Liao CH, Wang Q, Tan YJ, Luo R, Qiu Y, Ge XY. The ORF6, ORF8 and nucleocapsid proteins of SARS-CoV-2  
655 inhibit type I interferon signaling pathway. *Virus research*. 2020; 286:198074.
- 656 **Li W**, Shi Z, Yu M, Ren W, Smith C, Epstein JH, Wang H, Crameri G, Hu Z, Zhang H, et al. Bats are natural reservoirs  
657 of SARS-like coronaviruses. *Science*. 2005; 310(5748):676–679.
- 658 **Li Y**, Yang X, Wang N, Wang H, Yin B, Yang X, Jiang W. The divergence between SARS-CoV-2 and RaTG13 might  
659 be overestimated due to the extensive RNA modification. *Future Virology*. 2020; .
- 660 **Liu T**, Jia P, Fang B, Zhao Z. Differential expression of viral transcripts from single-cell RNA sequencing of  
661 moderate and severe COVID-19 patients and its implications for case severity. *Frontiers in Microbiology*.  
662 2020; 11:2568.
- 663 **Lopes LR**, de Mattos Cardillo G, Paiva PB. Molecular evolution and phylogenetic analysis of SARS-CoV-2 and  
664 hosts ACE2 protein suggest Malayan pangolin as intermediary host. *Brazilian Journal of Microbiology*. 2020;  
665 p. 1–7.
- 666 **Madhav N**, Oppenheim B, Gallivan M, Mulembakani P, Rubin E, Wolfe N. Pandemics: risks, impacts, and miti-  
667 gation. The International Bank for Reconstruction and Development / The World Bank; 2017.
- 668 **Malaiyan J**, Arumugam S, Mohan K, Radhakrishnan GG. An update on origin of SARS-CoV-2: Despite closest  
669 identity, bat (RaTG13) and Pangolin derived Coronaviruses varied in the critical binding site and O-linked  
670 glycan residues. *Journal of medical virology*. 2020; .
- 671 **McLaren W**, Gil L, Hunt SE, Riat HS, Ritchie GRS, Thormann A, Flicek P, Cunningham F. The Ensembl Vari-  
672 ant Effect Predictor. *Genome Biology*. 2016 Jun; 17(1):122. <https://doi.org/10.1186/s13059-016-0974-4>, doi:  
673 10.1186/s13059-016-0974-4.
- 674 **Mohammad S**, Bouchama A, Mohammad Alharbi B, Rashid M, Saleem Khatlani T, Gaber NS, Malik SS. SARS-  
675 CoV-2 ORF8 and SARS-CoV ORF8ab: Genomic Divergence and Functional Convergence. *Pathogens*. 2020;  
676 9(9):677.
- 677 **Nambou K**, Anakpa M. Deciphering the co-adaptation of codon usage between respiratory coronaviruses and  
678 their human host uncovers candidate therapeutics for COVID-19. *Infection, Genetics and Evolution*. 2020;  
679 85:104471.
- 680 **Paradis E**, Schliep K. ape 5.0: an environment for modern phylogenetics and evolutionary analyses in R. *Bioin-  
681 formatics*. 2019; 35:526–528.
- 682 **Patz JA**, Graczyk TK, Geller N, Vittor AY. Effects of environmental change on emerging parasitic diseases. *Inter-  
683 national journal for parasitology*. 2000; 30(12-13):1395–1405.
- 684 **Pereira F**. Evolutionary dynamics of the SARS-CoV-2 ORF8 accessory gene. *Infection, Genetics and Evolution*.  
685 2020; 85:104525.
- 686 **Perlman S**, Netland J. Coronaviruses post-SARS: update on replication and pathogenesis. *Nature reviews  
687 microbiology*. 2009; 7(6):439–450.
- 688 **Pickett BE**, Sadat EL, Zhang Y, Noronha JM, Squires RB, Hunt V, Liu M, Kumar S, Zaremba S, Gu Z, et al. ViPR:  
689 an open bioinformatics database and analysis resource for virology research. *Nucleic acids research*. 2012;  
690 40(D1):D593–D598.

- 691 **Qu XX**, Hao P, Song XJ, Jiang SM, Liu YX, Wang PG, Rao X, Song HD, Wang SY, Zuo Y, et al. Identification of  
692 two critical amino acid residues of the severe acute respiratory syndrome coronavirus spike protein for its  
693 variation in zoonotic tropism transition via a double substitution strategy. *Journal of Biological Chemistry*.  
694 2005; 280(33):29588–29595.
- 695 **R Core Team**. R: A language and environment for statistical computing. R Foundation for Statistical Computing.  
696 2020; <https://www.r-project.org/>.
- 697 **Revell LJ**. phytools: An R package for phylogenetic comparative biology (and other things). *Methods in Ecology  
698 and Evolution*. 2012; 3:217–223.
- 699 **Rice AM**, Morales AC, Ho AT, Mordstein C, Mühlhausen S, Watson S, Cano L, Young B, Kudla G, Hurst LD. Ev-  
700 idence for strong mutation bias towards, and selection against, U content in SARS-CoV-2: implications for  
701 vaccine design. *Molecular biology and evolution*. 2020 Jul; p. msaa188. [https://pubmed.ncbi.nlm.nih.gov/  
702 32687176](https://pubmed.ncbi.nlm.nih.gov/32687176), doi: 10.1093/molbev/msaa188, pMC7454790[pmcid].
- 703 **Robertson MP**, Igel H, Baertsch R, Haussler D, Ares Jr M, Scott WG. The structure of a rigorously conserved  
704 RNA element within the SARS virus genome. *PLoS Biol*. 2004; 3(1):e5.
- 705 **Sanjuán R**, Domingo-Calap P. Mechanisms of viral mutation. *Cellular and molecular life sciences*. 2016;  
706 73(23):4433–4448.
- 707 **Schoeman D**, Fielding BC. Coronavirus envelope protein: current knowledge. *Virology journal*. 2019; 16(1):1–  
708 22.
- 709 **Seemann T**. Prokka: rapid prokaryotic genome annotation. *Bioinformatics*. 2014; 30(14):2068–2069.
- 710 **Sharp PM**, Tuohy TM, Mosurski KR. Codon usage in yeast: cluster analysis clearly differentiates highly and lowly  
711 expressed genes. *Nucleic acids research*. 1986; 14(13):5125–5143.
- 712 **Sievers F**, Higgins DG. Clustal Omega for making accurate alignments of many protein sequences. *Protein  
713 Science*. 2018; 27(1):135–145.
- 714 **Smith EC**, Sexton NR, Denison MR. Thinking outside the triangle: replication fidelity of the largest RNA viruses.  
715 *Annual Review of Virology*. 2014; 1:111–132.
- 716 **Stamatakis A**. RAxML version 8: a tool for phylogenetic analysis and post-analysis of large phylogenies. *Bioin-  
717 formatics*. 2014; 30(9):1312–1313.
- 718 **Su S**, Wong G, Shi W, Liu J, Lai AC, Zhou J, Liu W, Bi Y, Gao GF. Epidemiology, genetic recombination, and  
719 pathogenesis of coronaviruses. *Trends in microbiology*. 2016; 24(6):490–502.
- 720 **Subissi L**, Posthuma CC, Collet A, Zevenhoven-Dobbe JC, Gorbalenya AE, Decroly E, Snijder EJ, Canard B, Imbert I.  
721 One severe acute respiratory syndrome coronavirus protein complex integrates processive RNA polymerase  
722 and exonuclease activities. *Proceedings of the National Academy of Sciences*. 2014; 111(37):E3900–E3909.
- 723 **Taylor JK**, Coleman CM, Postel S, Sisk JM, Bernbaum JG, Venkataraman T, Sundberg EJ, Frieman MB. Severe  
724 acute respiratory syndrome coronavirus ORF7a inhibits bone marrow stromal antigen 2 virion tethering  
725 through a novel mechanism of glycosylation interference. *Journal of virology*. 2015; 89(23):11820–11833.
- 726 **Tengs T**, Delwiche CF, Jonassen CM. A mobile genetic element in the SARS-CoV-2 genome is shared with multiple  
727 insect species. *bioRxiv*. 2020; .
- 728 **Tengs T**, Jonassen CM. Distribution and evolutionary history of the mobile genetic element s2m in coron-  
729 aviruses. *Diseases*. 2016; 4(3):27.
- 730 **Teoh KT**, Siu YL, Chan WL, Schlüter MA, Liu CJ, Peiris JM, Bruzzone R, Margolis B, Nal B. The SARS coronavirus  
731 E protein interacts with PALS1 and alters tight junction formation and epithelial morphogenesis. *Molecular  
732 biology of the cell*. 2010; 21(22):3838–3852.
- 733 **Weber S**, Ramirez C, Doerfler W. Signal hotspot mutations in SARS-CoV-2 genomes evolve as the virus spreads  
734 and actively replicates in different parts of the world. *Virus Research*. 2020; 289:198170.
- 735 **Weiss SR**. Forty years with coronaviruses. *Journal of Experimental Medicine*. 2020; 217(5).
- 736 **Wong HH**, Fung TS, Fang S, Huang M, Le MT, Liu DX. Accessory proteins 8b and 8ab of severe acute respiratory  
737 syndrome coronavirus suppress the interferon signaling pathway by mediating ubiquitin-dependent rapid  
738 degradation of interferon regulatory factor 3. *Virology*. 2018; 515:165–175.

- 739 **Wrapp D**, Wang N, Corbett KS, Goldsmith JA, Hsieh CL, Abiona O, Graham BS, McLellan JS. Cryo-EM structure  
740 of the 2019-nCoV spike in the prefusion conformation. *Science*. 2020; 367(6483):1260–1263. <https://science.sciencemag.org/content/367/6483/1260>, doi: 10.1126/science.abb2507.
- 742 **Wu K**, Chen L, Peng G, Zhou W, Pennell CA, Mansky LM, Geraghty RJ, Li F. A virus-binding hot spot on human  
743 angiotensin-converting enzyme 2 is critical for binding of two different coronaviruses. *Journal of virology*.  
744 2011; 85(11):5331–5337.
- 745 **Xiao K**, Zhai J, Feng Y, Zhou N, Zhang X, Zou JJ, Li N, Guo Y, Li X, Shen X, et al. Isolation of SARS-CoV-2-related  
746 coronavirus from Malayan pangolins. *Nature*. 2020; p. 1–4.
- 747 **Yates AD**, Achuthan P, Akanni W, Allen J, Allen J, Alvarez-Jarreta J, Amode MR, Armean IM, Azov AG, Bennett R,  
748 et al. Ensembl 2020. *Nucleic acids research*. 2020; 48(D1):D682–D688.
- 749 **Yi H**. 2019 novel coronavirus is undergoing active recombination. *Clinical Infectious Diseases*. 2020; .
- 750 **Yu G**. Using ggtree to Visualize Data on Tree-Like Structures. *Current protocols in bioinformatics*. 2020;  
751 69(1):e96.
- 752 **Zhang T**, Wu Q, Zhang Z. Probable pangolin origin of SARS-CoV-2 associated with the COVID-19 outbreak.  
753 *Current Biology*. 2020; .
- 754 **Zhang YZ**, Holmes EC. A Genomic Perspective on the Origin and Emergence of SARS-CoV-2. *Cell*.  
755 2020; 181(2):223 – 227. <http://www.sciencedirect.com/science/article/pii/S0092867420303287>, doi:  
756 <https://doi.org/10.1016/j.cell.2020.03.035>.
- 757 **Zhu Z**, Lian X, Su X, Wu W, Marraro GA, Zeng Y. From SARS and MERS to COVID-19: a brief summary and  
758 comparison of severe acute respiratory infections caused by three highly pathogenic human coronaviruses.  
759 *Respiratory research*. 2020; 21(1):1–14.



760 **Phylogenetic tree on a subset of samples**

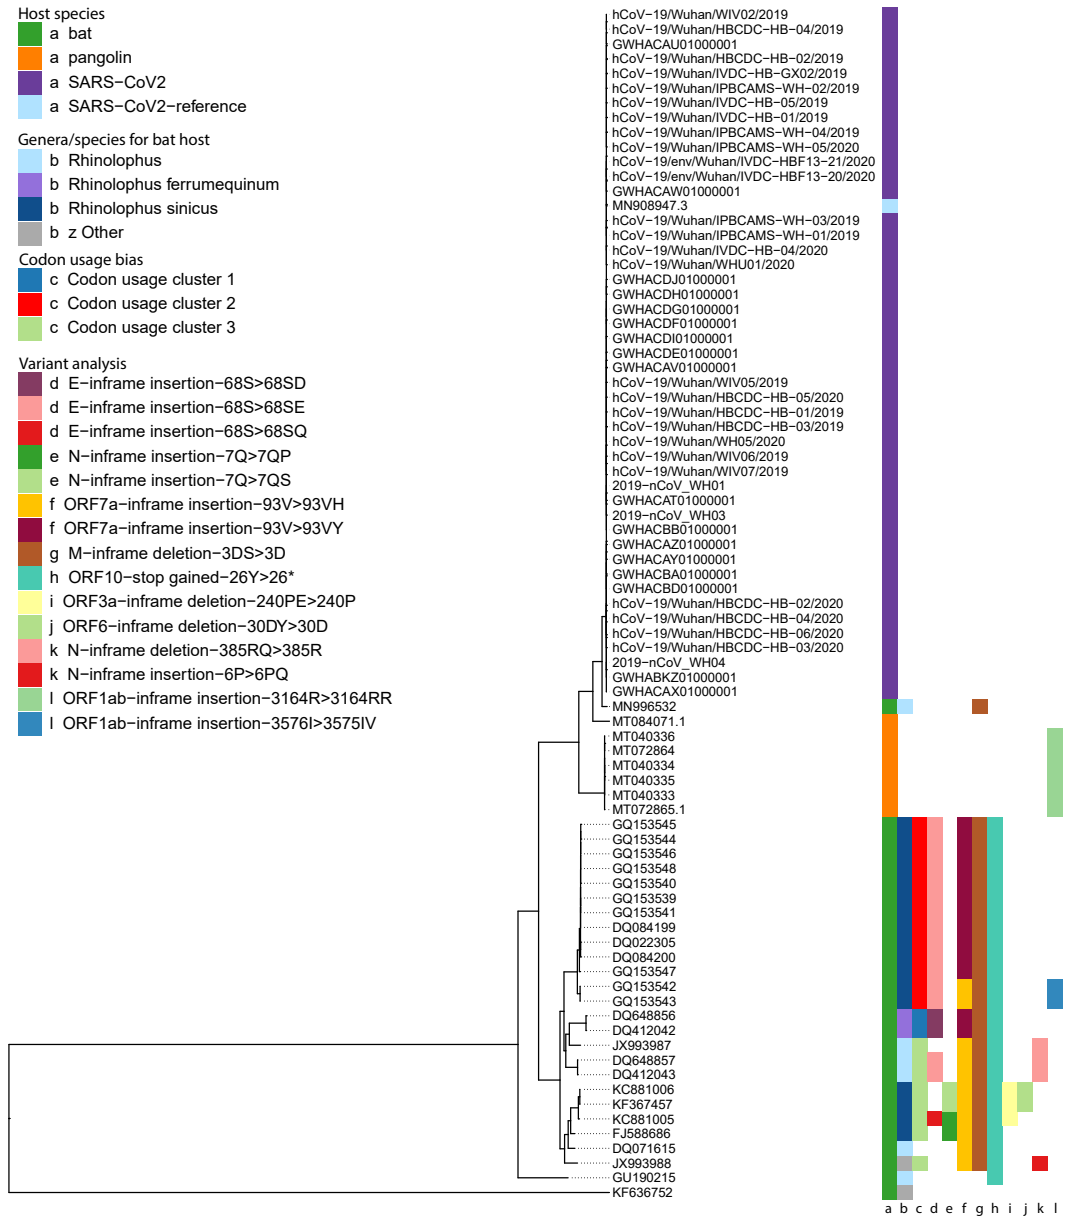

761 **Genome Annotation Presented by Source**

| <b>Host - Dataset</b> | <b>No. Genomes</b> | <b>No. Genes</b> | <b>No. Genes (PROKKA)</b> | <b>No. Genes (BLAST)</b> |
|-----------------------|--------------------|------------------|---------------------------|--------------------------|
| SARS-CoV-2 WI         | 46                 | 681              | 591                       | 90                       |
| SARS-CoV-2 GI         | 117                | 1736             | 1495                      | 241                      |
| SARS-CoV-2 EWR        | 1                  | 12               | N/A                       | N/A                      |
| Bat                   | 215                | 2427             | 2365                      | 62                       |
| Pangolin              | 7                  | 97               | 95                        | 2                        |

**Appendix 0 Table 3.** Table containing the total number of genomes and genes for each host-species group. Gene-sets listing number of genes identified by either PROKKA or BLAST. SARS-CoV-2 group names shortened as; WI: Wuhan Isolates, GI: German Isolates, EWR: Ensembl Wuhan Reference. Listed is the total number of all PROKKA genes identified and the number of BLAST genes which matched an Ensembl reference gene with 80% percentage identity.

762 Gene-gene network graph using amino acid sequences

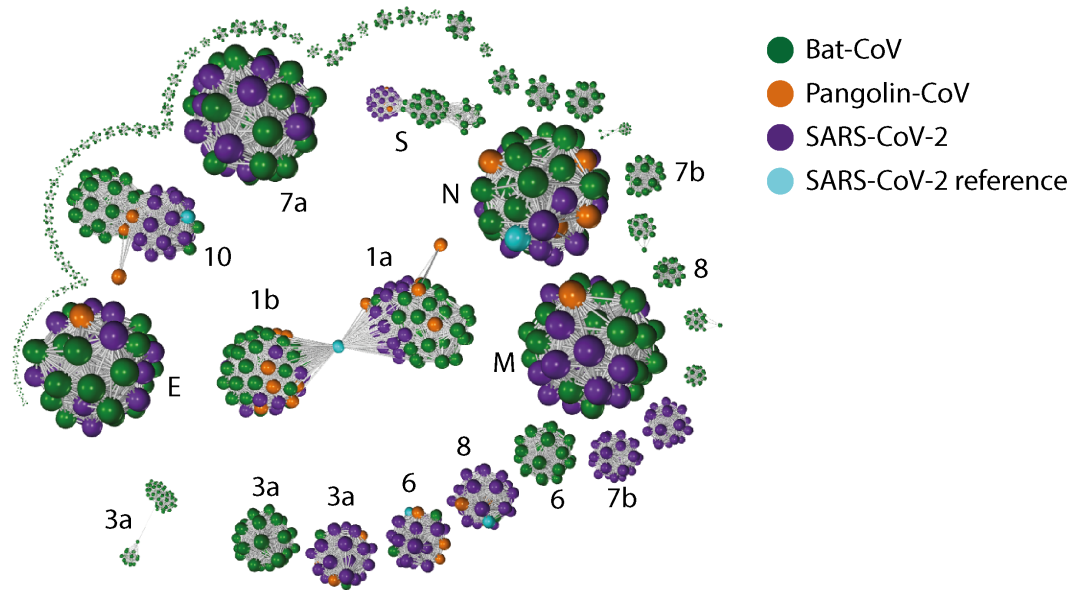

**Appendix 0 Figure 5.** Gene-gene similarity network analysis. Each node represents a amino acid sequence defined by PROKKA or BLAST (ORF10 and E). The nodes were compared against each other using BLAST, and nodes with high similarity (BLAST score  $\geq 60$  and a query coverage  $\geq 80\%$ ) were connected with an edge. The network graph is labelled with with SARS-CoV-2 gene names ("ORF" omitted). When the network graph is coloured by host species, genes showing higher degree of variability across species are highlighted. Similar to the network analysis on nucleotide sequences (Figure 2). Genes ORF3a, ORF6, ORF7b, ORF8, ORF10 and S show strong separation between nodes from different species. The degree of separation in ORF1ab are stronger than ORF10 in the nucleic acid network graph; the reverse is true for the amino acid network graph.

763 PCA plots based on the RSCU for each gene

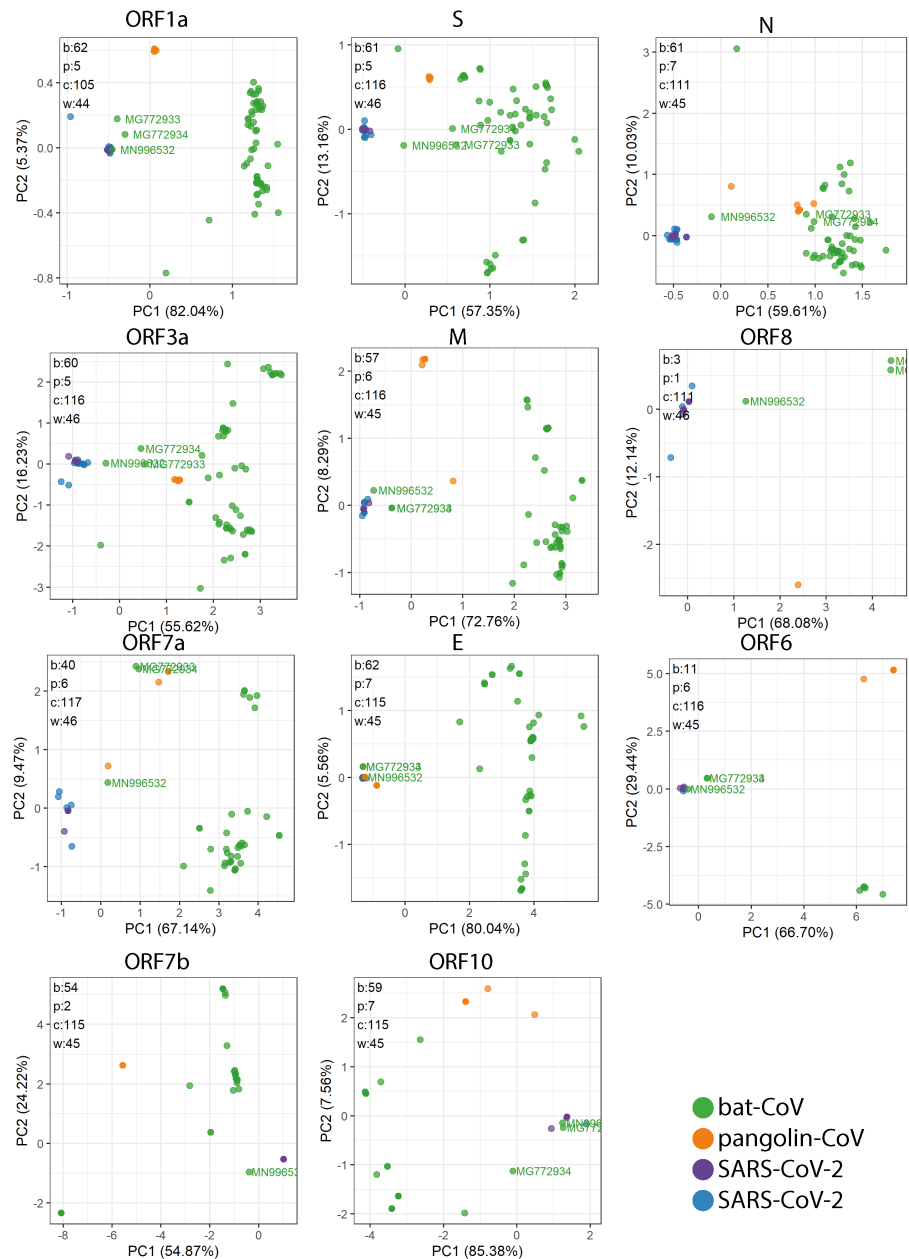

**Appendix 0 Figure 6.** Relative synonymous codon usage (RSCU) was calculated as the ratio of the observed frequency of codon to the expected frequency under the assumption of equal usage between synonymous codons for the same amino acids. This was carried out for each gene. The total number of genomes used in each plot are indicated in the top left corner for bat-CoV (b), pangolin-CoV (p), SARS-CoV-2 Charite dataset (c) and Wuhan dataset (w). As well as a strong separation between bat-CoV and SARS-CoV-2, there is also some separation within bat-CoV for most genes. Whilst we have illustrated the PCA based on RSCU for all genes, the interpretation for some of the shorter genes should be done with caution as they do not encompass the full spectrum of amino acids.

764 **PCA plots based on the RSCU for each gene**

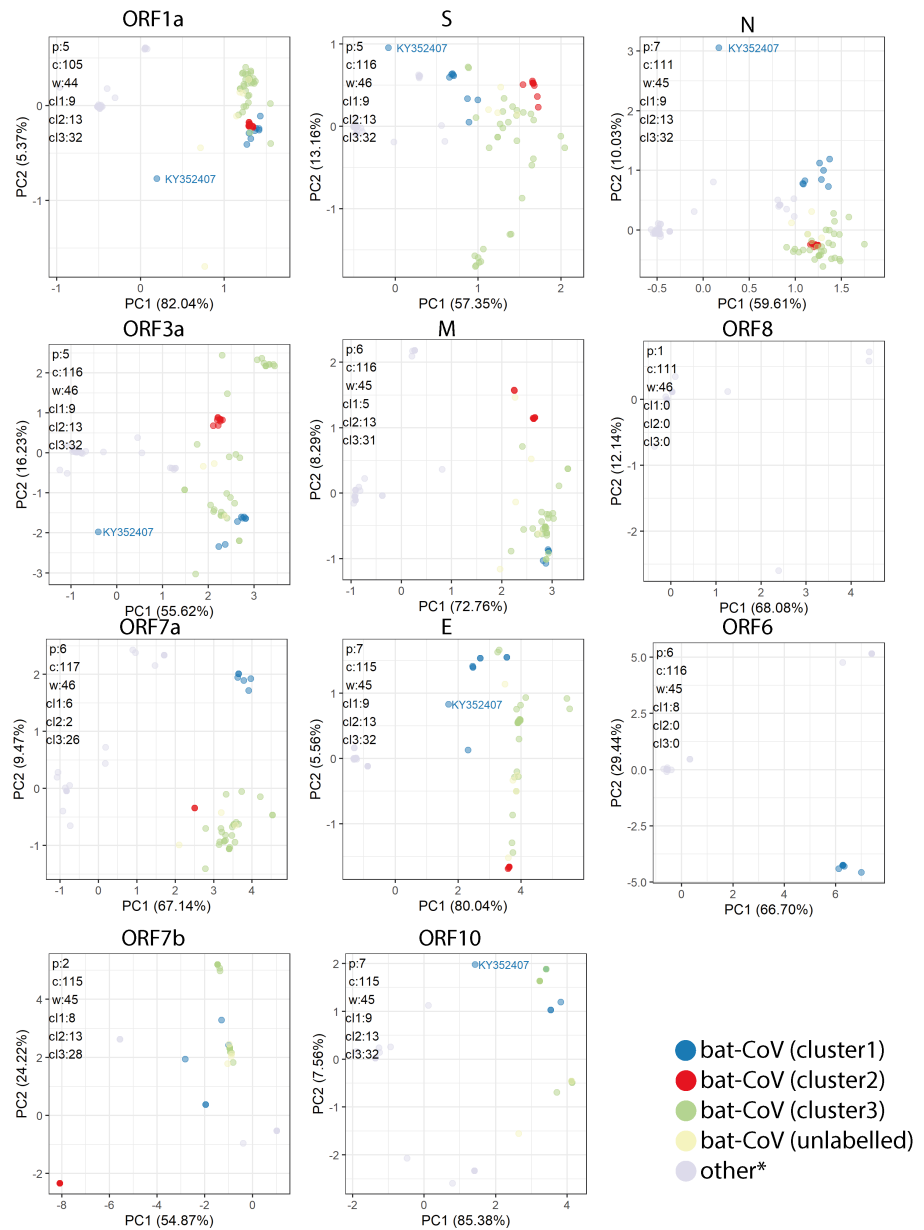

**Appendix 0 Figure 7.** Relative synonymous codon usage (RSCU) was calculated as the ratio of the observed frequency of codon to the expected frequency under the assumption of equal usage between synonymous codons for the same amino acids. This was carried out for each gene. The total number of genomes used in each plot are indicated in the top left corner for pangolin-CoV (p), SARS-CoV-2 Charite dataset (c), Wuhan dataset (w), cluster 1 bat-CoV (cl1), cluster 2 bat-CoV (cl2) and cluster 3 bat-CoV (cl3). The clustering for bat-CoV refers to the k-means clustering performed on PCA of RSCU using multiple genes (Figure 3). As well as a strong separation between bat-CoV and SARS-CoV-2, there is also some separation within bat-CoV for most genes. The clusters seen in RSCU PCA with multiple gene remain together for all genes where the majorities of the genomes are present. Whilst we have illustrated the PCA based on RSCU for all genes, the interpretation for some of the shorter genes should be done with caution as they do not encompass the full spectrum of amino acids.

765 **RNAseq analysis of SARS-CoV-2-mapping reads**

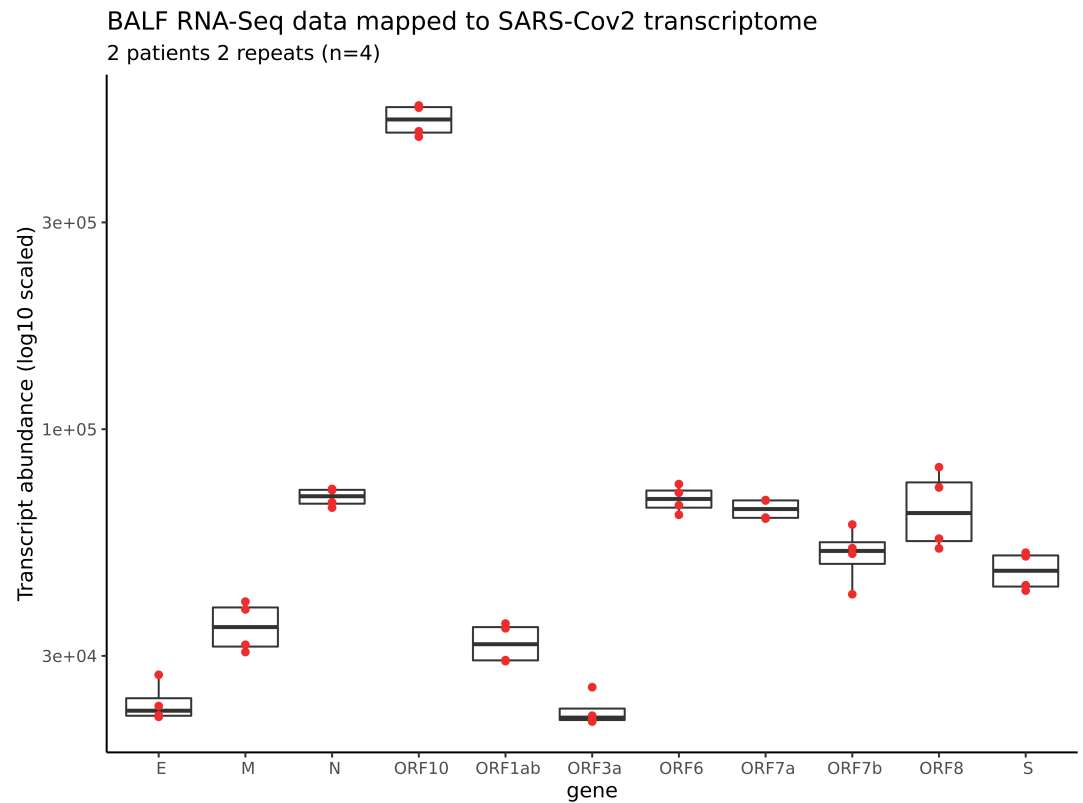

**Appendix 0 Figure 8.** Transcript level expression estimated using Kallisto on SARS-CoV-2 in broncho-alveolar flush (BALF) samples (n=4) collected from 2 patients in Wuhan outbreak. The results is shown here is inaccurate and for record purpose only. This analysis was done during the Hackathon event, during which we had not appreciated the importance of removing reads from the host organism nor did we recognised the lack of distinction between reads mapping to the viral genome or mRNA using this method.



766 **Synonymous codon ratios**

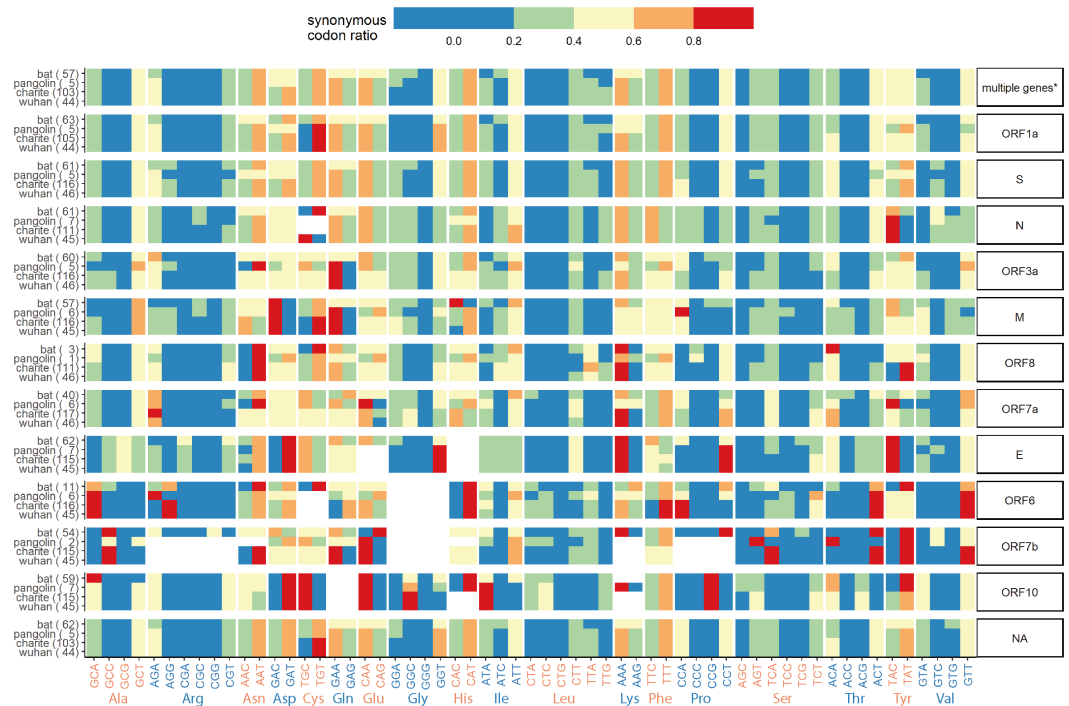

**Appendix 0 Figure 9.** Synonymous codon ratios are the ratio between the number of a given codon divided by the total number of codon coding for the same amino acid. By sorting this ratio in blocks of synonymous codons, this heatmap illustrate the preferential codons for each amino acid for each dataset across all genes. A number of codon usage bias are consistent across most genes and datasets. For instance, GCT is preferentially used for Alanine and GTT for Valine. On the whole, there seem to be less of a preferential codon use for bat, especially in longer genes or when multiple genes are accounted for, as per indicated by the higher frequency of more evenly distributed codon within each amino acid (i.e. for the bat dataset, the heatmap colours are of a similar level within each amino acid). Codons with GCs are generally underrepresented, such as in Arg (Arginine), Pro (Proline) and Ser (Serine). \* The values in this row is generated by combing codons from multiple genes, E, N, S, ORF1ab, ORF3a, ORF10.

## 767 Combined variant analysis

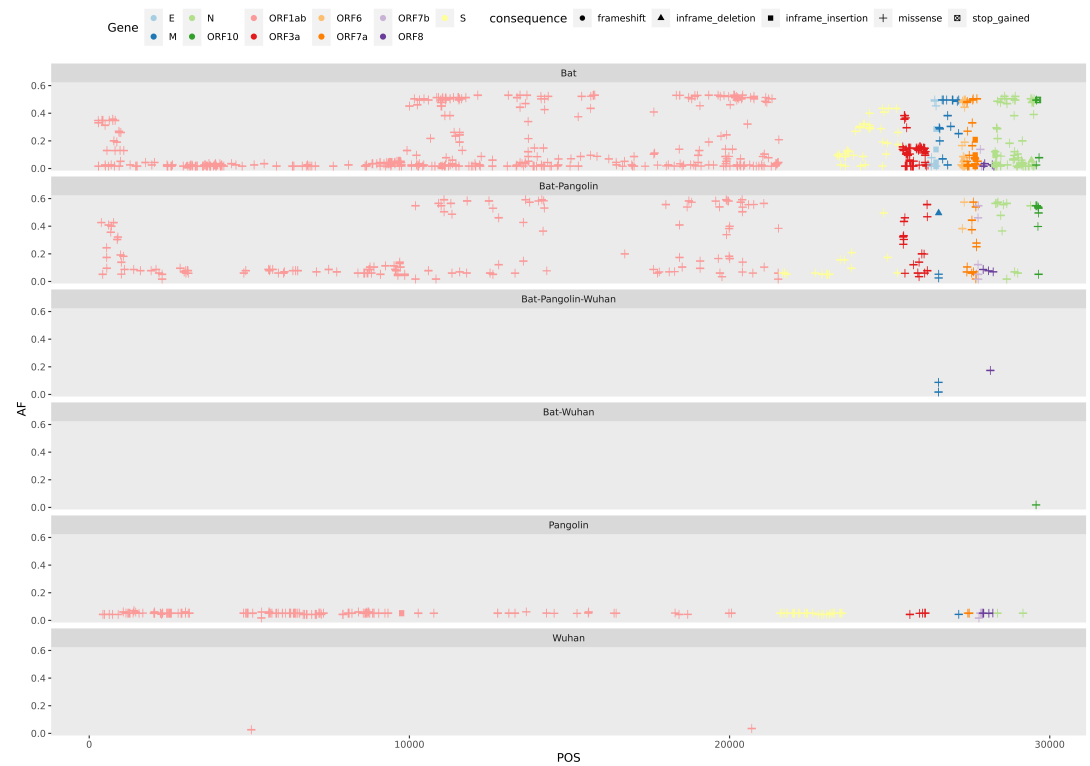

**Appendix 0 Figure 10.** The coordinate map of all variants called against the human reference SARS-Cov-2 genome. Each horizontal track shows the variants present in the host-species group. The colours shows the gene annotation origin of the variant and the shape consequence
